34 <sup>14</sup> Department of Pathology, Brigham & Women's Hospital and Harvard Medical School, Boston,  
35 MA, USA

36 <sup>15</sup> Vancouver Prostate Centre, Vancouver, British Columbia, Canada

37 <sup>16</sup> Department of Urologic Sciences, Faculty of Medicine, University of British Columbia, British  
38 Columbia, Canada

39

40 \* Corresponding author

41

## 42 **Abstract:**

43       Lineage plasticity, the ability of a cell to alter its identity, is an increasingly common  
44 mechanism of adaptive resistance to targeted therapy in cancer<sup>1,2</sup>. An archetypal example is the  
45 development of neuroendocrine prostate cancer (NEPC) after treatment of prostate  
46 adenocarcinoma (PRAD) with inhibitors of androgen signaling. NEPC is an aggressive variant of  
47 prostate cancer that aberrantly expresses genes characteristic of neuroendocrine (NE) tissues  
48 and no longer depends on androgens. To investigate the epigenomic basis of this resistance  
49 mechanism, we profiled histone modifications in NEPC and PRAD patient-derived xenografts  
50 (PDXs) using chromatin immunoprecipitation and sequencing (ChIP-seq). We identified a vast  
51 network of *cis*-regulatory elements (N~15,000) that are recurrently activated in NEPC. The  
52 FOXA1 transcription factor (TF), which pioneers androgen receptor (AR) chromatin binding in  
53 the prostate epithelium<sup>3,4</sup>, is reprogrammed to NE-specific regulatory elements in NEPC.  
54 Despite loss of dependence upon AR, NEPC maintains FOXA1 expression and requires FOXA1  
55 for proliferation and expression of NE lineage-defining genes. Ectopic expression of the NE  
56 lineage TFs ASCL1 and NKX2-1 in PRAD cells reprograms FOXA1 to bind to NE regulatory  
57 elements and induces enhancer activity as evidenced by histone modifications at these sites.  
58 Our data establish the importance of FOXA1 in NEPC and provide a principled approach to  
59 identifying novel cancer dependencies through epigenomic profiling.

60

## 61 **Introduction:**

62       In recent years, potent AR pathway inhibitors have extended the survival of patients with  
63 metastatic prostate cancer<sup>5,6</sup>. Prostate tumors inevitably escape AR inhibition through  
64 reactivation of AR signaling or, increasingly, via lineage plasticity<sup>1,7</sup>. The mechanisms underlying  
65 lineage plasticity remain unclear but likely involve transdifferentiation of PRAD to NEPC rather  
66 than *de novo* emergence of NEPC. NEPC and PRAD tumors from an individual patient share  
67 many somatic DNA alterations, implying a common ancestral tumor clone<sup>8</sup>. While the genomic

68 profiles of NEPC and PRAD are relatively similar, their gene expression profiles and clinical  
69 behavior differ markedly<sup>9</sup>. We therefore set out to characterize epigenomic differences between  
70 NEPC and PRAD, hypothesizing that reprogramming of distinct regulatory elements drives their  
71 divergent phenotypes.

72

### 73 **Results:**

74 We performed ChIP-seq for the histone post-translational modification H3K27ac to  
75 identify active regulatory elements in the LuCaP PDX series<sup>10</sup>, a set of xenografts derived from  
76 advanced PRAD (N=22) and treatment-emergent NEPC (N=5). We identified a median of  
77 55,095 H3K27ac peaks per sample (range 37,599-74,640) (Supplementary Table 1). Notably,  
78 the transcriptomes of the LuCaP PDXs reflect differences in gene expression observed between  
79 clinical PRAD and NEPC metastases (Supplementary Fig. 1a), indicating their relevance to  
80 clinical prostate cancer.

81 Unsupervised hierarchical clustering and principal component analysis based on  
82 genome-wide H3K27 acetylation cleanly partitioned NEPC and PRAD LuCaP PDXs (Fig. 1a,  
83 Supplementary Fig. 1b, c). We identified 14,985 sites with eight-fold or greater increases in  
84 H3K27 acetylation in NEPC compared to PRAD at an adjusted  $p$ -value of  $10^{-3}$ . We termed these  
85 sites neuroendocrine-enriched candidate regulatory elements (“Ne-CREs”; Fig. 1b,  
86 Supplementary Table 2, Supplementary Fig. 1d). A smaller set of sites (4,338) bore greater  
87 H3K27ac signal in PRAD (termed “Ad-CREs”). Liver metastases from clinical NEPC and PRAD  
88 demonstrated enrichment of H3K27ac at Ne-CREs and Ad-CREs, respectively, confirming that  
89 the LuCaP PDX models reflect lineage-specific epigenomic features of clinical prostate tumors  
90 (Supplementary Fig. 1e).

91 Ad-CREs were found near prostate lineage genes such as *KLK3*, *HOXB13*, and *NKX3-*  
92 *1*, while Ne-CREs resided near genes enriched for neuronal and developmental annotations,  
93 including *CHGA*, *ASCL1*, and *SOX2*<sup>11</sup> (Fig. 1c, Supplementary Table 3). Genes with higher  
94 expression in NEPC compared to PRAD were enriched for nearby Ne-CREs (Supplementary  
95 Fig. 1f) and formed three-dimensional contacts with a greater number of Ne-CREs as assessed  
96 by H3K27ac HiChIP (Fig. 1d, Supplementary Fig. 1g-h, and Supplementary Tables 4 and 5).  
97 For example, *ASCL1*, which encodes a neural lineage TF that is highly upregulated in NEPC  
98 (Supplementary Fig. 1a), interacts with 15 gene-distal Ne-CREs between 280kb and 465kb  
99 telomeric to *ASCL1*, including two novel NEPC-restricted super-enhancers within intronic  
100 regions of *C12ORF42* (Fig. 1e). These results suggest that Ne-CREs regulate neuroendocrine  
101 transcriptional programs through interaction with NEPC gene promoters.

102 We nominated candidate TFs that may orchestrate NEPC lineage gene expression by  
103 binding to Ne-CREs. Lineage-defining TF genes often reside within densely H3K27-acetylated  
104 super-enhancers<sup>12</sup> and form core regulatory circuits, or “cliques”, by mutual binding of one  
105 another’s *cis*-regulatory regions<sup>13,14</sup>. Several TFs showed clique enrichment specifically in  
106 NEPC (Fig. 1f) and/or were encompassed by NEPC-restricted super-enhancers (Supplementary  
107 Fig. 2), including known NE lineage TFs (*e.g.*, *ASCL1* and *INSM1*) and novel candidates such  
108 as *HOXB2-5*.

109 Notably, a single TF gene, *FOXA1*, demonstrated clique enrichment in all NEPC and  
110 PRAD LuCaP PDXs (Fig. 1f). *FOXA1* is a pioneer TF of endodermal tissues<sup>3</sup> with a critical role  
111 in prostate development<sup>4</sup> but no characterized function in NEPC. The forkhead motif recognized  
112 by *FOXA1* was the second most significantly enriched nucleotide sequence within Ne-CREs  
113 (Fig. 1g). *FOXA2*, a previously-reported NEPC TF<sup>15</sup>, does not wholly account for the forkhead  
114 motif enrichment because *FOXA2* was not expressed in several NEPC samples (Figs. 2a,b;  
115 Supplementary Fig. 3a). In contrast, *FOXA1* was expressed in all NEPCs (Fig 2a-b; Table S6)  
116 as well as in resident neuroendocrine cells of benign prostate tissue (Supplementary Fig. 3).

117 Multiple lines of investigation supported a pivotal role of *FOXA1* in NEPC. A super-  
118 enhancer encompassed *FOXA1* in all NEPC LuCaP PDXs (Fig. 2c, Supplementary Fig. 2). In  
119 NEPC, the *FOXA1* promoter shed contacts with its regulatory region identified in PRAD<sup>16</sup> and  
120 looped to a distinct NEPC-restricted super-enhancer (Fig. 2d). Both the distal superenhancer  
121 and promoter were co-bound by *FOXA1* and *ASCL1*, suggesting an auto-regulatory circuit that  
122 is characteristic of master transcriptional regulators<sup>17</sup>. Suppression of *FOXA1* in a variety of  
123 NEPC cellular models<sup>18,19</sup> demonstrated that *FOXA1* is essential for cellular proliferation (Fig.  
124 2e-g) and expression of NE markers, including NE lineage TFs such as *FOXA2* and *INSM1*  
125 (Fig. 2h). Analysis of a published shRNA screen confirmed a dependency on *FOXA1* in the  
126 NEPC cell line NCI-H660 (Fig. 2i). Thus, *FOXA1* exhibits several features of a master  
127 transcriptional regulator in NEPC.

128 We profiled *FOXA1* binding sites in NEPC and PRAD using ChIP-seq. *FOXA1* relocates  
129 to a distinct set of binding sites in NEPC PDXs (Fig. 3a), which overlap with the majority of Ne-  
130 CREs (Fig. 3b). In PRAD, Ne-CREs were devoid of *FOXA1* binding and heterochromatic as  
131 assayed by ATAC-seq, but they acquired *FOXA1* binding and chromatin accessibility in NEPC  
132 (Fig. 3c). Conversely, Ad-CREs lost *FOXA1* binding in NEPC and became less accessible by  
133 ATAC-seq. To contextualize the extent of *FOXA1* reprogramming in NEPC, we compared  
134 *FOXA1* binding profiles in normal prostate epithelium, localized PRAD, and PDXs derived from  
135 metastatic PRAD. At the same level of stringency, fewer than 500 sites exhibited differential

136 FOXA1 binding between these categories; by comparison, FOXA1 binding was gained at  
137 20,935 and lost at 29,308 sites in NEPC compared to metastatic PRAD (Fig. 3d).

138 We sought to understand the mechanism by which FOXA1 binding is reprogrammed in  
139 NEPC. In addition to DNA sequence, cooperative binding with partner TFs is an important  
140 determinant of pioneer factor localization<sup>20</sup>. Since the motifs recognized by ASCL1 and NKX2-1  
141 were highly enriched at Ne-CREs (Fig. 1g), we tested whether overexpression of these TFs in  
142 the PRAD cell line LNCaP could induce FOXA1 binding at Ne-CREs. Overexpression of ASCL1  
143 and NKX2-1 (A+N) increased FOXA1 binding at NEPC-enriched FOXA1 binding sites (Fig.  
144 4a,b) and induced H3K27 acetylation of Ne-CREs (Fig. 4c-f). ASCL1 co-localized with FOXA1  
145 at NEPC-enriched FOXA1 binding sites and Ne-CREs (Fig. 4g-h). A+N expression recapitulated  
146 global transcriptional changes between NEPC and PRAD, including suppression of *AR* and  
147 induction of *SYP* and *CHGA* (Fig. 4i-k). Thus, ectopic expression of ASCL1 and NKX2-1 is  
148 sufficient to partially reprogram FOXA1 binding in PRAD to Ne-CREs and induce *de novo*  
149 H3K27 acetylation at these regions, with resultant NEPC gene expression.

150 Despite intense interest, it remains unclear why PRAD can adopt a seemingly unrelated  
151 lineage to overcome androgen blockade, while most cancers do not dramatically alter their  
152 cellular identity throughout treatment. Lineage tracing studies have demonstrated that the  
153 epithelial cells that give rise to PRAD share a common developmental progenitor with resident  
154 neuroendocrine cells in the prostate<sup>21,22</sup>. In this common progenitor cell, Ne-CREs and their  
155 FOXA1 binding sites might be physiologically poised for activation upon commitment to a  
156 neuroendocrine lineage. In support of this model, genes that are highly expressed in normal  
157 neuroendocrine prostate cells are also highly expressed in NEPC (Fig. 5a), and are enriched for  
158 nearby Ne-CREs and NEPC-restricted FOXA1 binding sites (Fig. 5b). Additionally, Ne-CREs  
159 are relatively hypomethylated in normal prostate tissue and PRAD despite absence of H3K27  
160 acetylation, a feature of decommissioned enhancers that were active in development (Fig.  
161 5c)<sup>23,24</sup>.

162 We hypothesized that a neuroendocrine epigenomic program is encoded in the  
163 developmental history of the prostate, thereby priming NEPC genes for inappropriate activation  
164 under the selective pressure of androgen blockade. Consistent with this hypothesis, many  
165 genes that become highly expressed in NEPC have “bivalent” (H3K4me3<sup>+</sup>/H3K27me3<sup>+</sup>)  
166 promoter histone marks in normal prostate tissue and PRAD (Fig. 6a). Bivalent genes are  
167 thought to be poised for lineage-specific activation upon removal of H3K27me3 at the  
168 appropriate stage of development<sup>25-27</sup>. Our data suggested that a similar principle underlies  
169 transcriptional changes in prostate cancer lineage plasticity. H3K27me3 levels decreased in

170 NEPC compared to PRAD at 633 gene promoters, which were enriched for binding sites of the  
171 REST repressor of neuronal lineage transcription<sup>28</sup> (Supplementary Fig. 4). Similar numbers of  
172 these promoters were bivalent (H3K4me3<sup>+</sup>/H3K27me3<sup>+</sup>; n=195) and repressed (H3K4me3<sup>-</sup>  
173 /H3K27me3<sup>+</sup>; n=229) in PRAD (Fig. 6b). Critically, however, genes with bivalent (H3K4me3<sup>+</sup>)  
174 promoters in PRAD became more highly expressed in NEPC (Fig. 6c) than H3K4me3<sup>-</sup> genes.  
175 These bivalent genes, which included NEPC TFs *ASCL1*, *INSM1*, and *SOX2*, may have been  
176 prepared for activation in the development of a prostate progenitor cell. Their residual H3K4me3  
177 and promoter hypomethylation (Fig. 6d) suggest heightened potential for re-activation<sup>24</sup> in  
178 NEPC with the disruption of pro-luminal AR-driven transcriptional programs.

179

## 180 **Discussion:**

181 In summary, our work demonstrates that the *cis*-regulatory landscape of prostate cancer  
182 is extensively reprogrammed in NEPC. Epigenomic profiling of human tumors identified a critical  
183 role of FOXA1 in this process, which perhaps has been overlooked because candidate drivers  
184 of NEPC have been nominated and prioritized mainly based on differential expression or  
185 somatic DNA alterations<sup>9,11,29,30</sup>. FOXA1 has been reported to *inhibit* neuroendocrine  
186 differentiation of prostate adenocarcinoma, based on the observations that FOXA1 is  
187 downregulated in NEPC and that FOXA1 knock-down induces neuroendocrine features in  
188 PRAD cell lines<sup>31</sup>. Our data demonstrate that FOXA1 remains crucial in NEPC despite  
189 consistent, modest transcript downregulation in NEPC compared to PRAD. Our H3K27ac  
190 HiChIP data reveal that in NEPC, *FOXA1* contacts distal super-enhancers that are distinct from  
191 its PRAD enhancers and contain binding sites for NE-associated TFs such as *ASCL1* and  
192 *INSM1* (Fig 2d. and Supplementary Fig. 5). Thus, an NEPC-specific regulatory program may  
193 maintain FOXA1 expression at lower levels that are conducive to NE gene expression,  
194 reconciling our findings with the reported pro-neuroendocrine effects of partial FOXA1  
195 suppression in PRAD<sup>31</sup>. While our data show that FOXA1 is essential in NEPC, further studies  
196 are required to determine if FOXA1 cistrome reprogramming directly activates Ne-CREs and to  
197 assess its role dynamic lineage plasticity.

198 FOXA1 may have a more general role in controlling neuroendocrine differentiation. For  
199 example, in small cell lung cancer (SCLC), a neuroendocrine lung cancer variant that can  
200 emerge *de novo* or from *EGFR*-mutant lung adenocarcinoma after targeted kinase inhibition,  
201 *FOXA1* is highly expressed and encompassed by a super-enhancer<sup>32</sup>. We observe extensive  
202 H3K27 acetylation in SCLC cell lines specifically at Ne-CREs and NEPC-enriched FOXA1  
203 binding sites, suggesting similar enhancer usage between in SCLC and NEPC (Supplementary

204 Fig. 6), consistent with recent reports<sup>29,33</sup>. Ultimately, therapeutic targeting of FOXA1 and/or  
205 proteins that collaborate with or covalently modify this TF presents an attractive strategy to  
206 inhibit lineage plasticity, as FOXA1 is a common vulnerability in both PRAD and NEPC.

207

## 208 **Methods:**

### 209 **Patient-derived xenograft and tissue specimens**

210 LuCaP patient-derived xenografts (PDXs) have been described previously<sup>10,34-37</sup> with the  
211 exception of LuCaP 208.1. LuCaP 208.1 was derived from treatment-emergent NEPC and  
212 demonstrates typical small cell histology. All LuCaP PDXs were derived from resected  
213 metastatic prostate cancer with informed consent of patient donors as described previously<sup>10</sup>  
214 under a protocol approved by the University of Washington Human Subjects Division IRB. Liver  
215 metastasis needle biopsy specimens were obtained from the Dana-Farber Cancer Institute Gelb  
216 Center biobank and were collected under DFCI/Harvard Cancer Center IRB-approved protocols.  
217 Metastases were reviewed by a clinical pathologist. The NEPC metastasis was obtained from a  
218 patient with *de novo* metastatic prostate adenocarcinoma after 17 months of androgen  
219 deprivation therapy with leuprolide and bicalutamide. Immunohistochemistry revealed staining  
220 for synaptophysin, chromogranin, and NKX3-1 (weak), and absence of RB1, AR, and PSA.

221

### 222 **Epigenomic profiling**

#### 223 *Histone mark ChIP in LuCaP PDXs*

224 Chromatin immunoprecipitation (ChIP) for histone marks (H3K27ac, H3K27me3, and  
225 H3K4me3) in PDXs was performed as previously described<sup>38</sup>. Briefly, 20-30 mg of frozen tissue  
226 was pulverized using the CryoPREP dry impactor system (Covaris). The tissue was then fixed  
227 using 1% formaldehyde (Thermo fisher) in PBS for 18 minutes at 37 degrees Celsius and was  
228 quenched with 125 mM glycine. Chromatin was lysed in ice-cold lysis buffer (50mM Tris, 10mM  
229 EDTA, 1% SDS with protease inhibitor) and was sheared to 300~800 bp using the Covaris  
230 E220 sonicator (105 watt peak incident power, 5% duty cycle, 200 cycles/burst) for 10 min. Five  
231 volumes of dilution buffer (1% Triton X-100, 2 mM EDTA, 150 mM NaCl, 20 mM Tris HCl pH  
232 8.1) were added to chromatin. The sample was then incubated with antibodies (H3K27ac,  
233 Diagenode, C15410196; H3K27me3, Cell Signaling 9733S; H3K4me3, Diagenode C15410003  
234 premium) coupled with protein A and protein G beads (Life Technologies) at 4 degrees Celsius  
235 overnight. The chromatin was washed with RIPA wash buffer (100 mM Tris pH 7.5, 500 mM  
236 LiCl, 1% NP-40, 1% sodium deoxycholate) for 10 minutes six times and rinsed with TE buffer  
237 (pH 8.0) once.

238

### 239 *Transcription factor ChIP in PDXs.*

240           ChIP for transcription factors (FOXA1 and ASCL1) in PDXs was performed as  
241 previously described<sup>38</sup>. Briefly, 50-80 mg of frozen tissue was pulverized using the CryoPREP  
242 dry impactor system (Covaris). The tissue was then fixed using 1% formaldehyde (Thermo  
243 fisher) in PBS for 18 minutes at room temperature and was quenched with 125 mM glycine.  
244 Chromatin was lysed in 1mL ice-cold Myer's Lysis buffer (0.1% SDS, 0.5% sodium  
245 deoxycholate and 1% NP-40 with protease inhibitor) and was sheared to 300~800 bp using the  
246 Covaris E220 sonicator (140 PIP, 5% duty cycle, 200 cycles/burst) for 20 min. The sample was  
247 then incubated with antibodies (FOXA1, ab23738, Abcam; ASCL1, ab74065) coupled with  
248 protein A and protein G beads (Life Technologies) at 4 degrees Celsius overnight. The  
249 chromatin was washed with RIPA wash buffer (100 mM Tris pH 7.5, 500 mM LiCl, 1% NP-40,  
250 1% sodium deoxycholate) for 10 minutes six times and rinsed with TE buffer (pH 8.0) once.

251

### 252 *LNCaP ChIP*

253           ChIP in LNCaP was performed as previously described<sup>38</sup>. 10 million cells were fixed  
254 with 1% formaldehyde at room temperature for 10 minutes and quenched. Cells were collected  
255 in lysis buffer (1% NP-40, 0.5% sodium deoxycholate, 0.1% SDS and protease inhibitor  
256 (#11873580001, Roche) in PBS)<sup>39</sup>. Chromatin was sonicated to 300-800 bp using a Covaris  
257 E220 sonicator (140 watt peak incident power, 5% duty cycle, 200 cycleburst). Antibodies  
258 (FOXA1, ab23738, Abcam; H3K27ac, C15410196, Diagenode; ASCL1, ab74065) were  
259 incubated with 40 µl of Dynabeads protein A/G (Invitrogen) for at least 6 hours before  
260 immunoprecipitation of the sonicated chromatin overnight. Chromatin was washed with LiCl  
261 wash buffer (100 mM Tris pH 7.5, 500 mM LiCl, 1% NP-40, 1% sodium deoxycholate) 6 times  
262 for 10 minutes sequentially.

263

### 264 *ChIP sequencing*

265           Sequencing libraries were generated from purified IP sample DNA using the  
266 ThruPLEX-FD Prep Kit (Rubicon Genomics). Libraries were sequenced using 150-base paired  
267 end reads on an Illumina platform (Novogene).

268

### 269 *ATAC-seq*

270           LuCaP PDX tissues were resuspended and dounced in 300 ul of RSB buffer (10 mM  
271 Tris-HCl pH 7.4, 10 mM NaCl, and 3 mM MgCl<sub>2</sub> in water) containing 0.1% NP40, 0.1% Tween-



272 20, and 0.01% digitonin. Homogenates were transferred to a 1.5 ml microfuge tube and  
273 incubated on ice for 10 minutes. Nuclei were filtered through a 40  $\mu$ m cell strainer and nuclei  
274 were washed with RSB buffer and counted. 50,000 nuclei were resuspended in 50  $\mu$ l of  
275 transposition mix<sup>40</sup> (2.5  $\mu$ l transposase (100 nM final), 16.5  $\mu$ l PBS, 0.5  $\mu$ l 1% digitonin, 0.5  $\mu$ l  
276 10% Tween-20, and 5  $\mu$ l water) by pipetting up and down six times. Transposition reactions  
277 were incubated at 37 C for 30 minutes in a thermomixer with shaking at 1,000 r.p.m. Reactions  
278 were cleaned with Qiagen columns. Libraries were amplified as described previously<sup>41</sup> and  
279 sequenced on an Illumina Nextseq 500 with 35 base paired-end reads.

280

### 281 **ChIP-seq data analysis**

282 ChIP-sequencing reads were aligned to the human genome build hg19 using the  
283 Burrows-Wheeler Aligner (BWA) version 0.7.15<sup>42</sup>. Non-uniquely mapping and redundant reads  
284 were discarded. MACS v2.1.1.20140616<sup>43</sup> was used for ChIP-seq peak calling with a q-value  
285 (FDR) threshold of 0.01. ChIP-seq data quality was evaluated by a variety of measures,  
286 including total peak number, FrIP (fraction of reads in peak) score, number of high-confidence  
287 peaks (enriched > ten-fold over background), and percent of peak overlap with DHS peaks  
288 derived from the ENCODE project. ChIP-seq peaks were assessed for overlap with gene  
289 features and CpG islands using annotatr<sup>44</sup>. IGV<sup>45</sup> was used to visualize normalized ChIP-seq  
290 read counts at specific genomic loci. ChIP-seq heatmaps were generated with deepTools<sup>46</sup> and  
291 show normalized read counts at the peak center  $\pm$  2kb unless otherwise noted. Overlap of ChIP-  
292 seq peaks was assessed using BEDTools. Peaks were considered overlapping if they shared  
293 one or more base-pairs.

294

### 295 *Identification and annotation of PRAD- and NEPC-enriched ChIP-seq peaks*

296 Sample-sample clustering, principal component analysis, and identification of lineage-  
297 enriched peaks were performed using Mapmaker (<https://bitbucket.org/cfce/mapmaker>), a ChIP-  
298 seq analysis pipeline implemented with Snakemake<sup>47</sup>. ChIP-seq data from PRAD and NEPC  
299 LuCaP PDXs were compared to identify H3K27ac, H3K27me3, and FOXA1 peaks with  
300 significant enrichment in the NEPC or PRAD lineage. Only LuCaP PDXs from distinct patients  
301 were included, with the exception of the H3K27me3 differential peak analysis, which included  
302 both LuCaP 145.1 and 145.2, two LuCaP PDXs derived from distinct NEPC metastases from a  
303 single patient. A union set of peaks for each histone modification or TF was created using  
304 BEDTools. narrowPeak calls from MACS were used for H3K27ac and FOXA1, while broadPeak  
305 calls were used for H3K27me3. The number of unique aligned reads overlapping each peak in

306 each sample was calculated from BAM files using BEDtools. Read counts for each peak were  
307 normalized to the total number of mapped reads for each sample. Quantile normalization was  
308 applied to this matrix of normalized read counts. Using DEseq2<sup>48</sup>, lineage-enriched peaks were  
309 identified at the indicated FDR-adjusted p-value (padj) and log<sub>2</sub> fold-change cutoffs (H3K27ac,  
310 padj < 0.001, |log<sub>2</sub> fold-change| > 3; FOXA1, padj < 0.001, |log<sub>2</sub> fold-change| > 2; H3K27me3,  
311 padj < 0.01, |log<sub>2</sub> fold-change| > 1). Unsupervised hierarchical clustering was performed based  
312 on Spearman correlation between samples. Principal component analysis was performed using  
313 the prcomp R function. Enriched *de novo* motifs in differential peaks were detected using  
314 HOMER version 4.7. The top non-redundant motifs were ranked by adjusted p-value.

315 The GREAT tool<sup>49</sup> was used to assess for enrichment of Gene Ontology (GO) and  
316 MSigDB perturbation annotations among genes near differential ChIP-seq peaks, assigning  
317 each peak to the nearest gene within 500kb. The cistromedb toolkit  
318 (<http://dbtoolkit.cistrome.org/>) was used to compare ChIP-seq peaks for overlap with peaks from  
319 a large database of uniformly analyzed published ChIP-seq data (quantified as a “GIGGLE  
320 score”)<sup>50</sup>. Published TFs and histone marks were ranked by similarity to the query dataset  
321 based on the top 1,000 peaks in each published dataset. Prior to cistromedb toolkit analysis,  
322 ChIPseq peaks were mapped from hg19 to hg38 using the UCSC liftover tool  
323 (<https://genome.ucsc.edu/cgi-bin/hgLiftOver>).

324 For analysis of H3K27 acetylation in lung cancer at lineage-enriched candidate  
325 regulatory elements, fastq files were generated from sequence read archives (SRA) from  
326 published ChIP-seq experiments for SCLC<sup>51</sup> and LUAD<sup>52-55</sup> (SRA numbers SRR568435,  
327 SRR3098556, SRR4449027, SRR4449025, and SRR6124068).

328 For Fig. 5c, H3K27ac ChIP-seq peaks from primary peripheral blood monocytes  
329 (ENCFF540CVX) and epithelial keratinocytes (ENCFF943CBQ)<sup>53</sup> were used as a comparator to  
330 peaks derived from LuCaP PDXs. For these comparisons, monocyte and keratinocyte peaks  
331 within 1kb of a LuCaP peak were excluded.

332

### 333 **RNA-seq and differential expression analysis**

334 RNA-seq data from human adenocarcinoma and NEPC have been reported previously<sup>8</sup>  
335 and were obtained from dbGaP (accession number phs000909.v1.p1). Transcriptomes were  
336 sequenced from two replicates from each of five PRAD LuCaP PDXs (23, 77, 78, 81, and 96)  
337 and five NEPC LuCaP PDXs (49, 93, 145.1, 145.2, and 173.1). RNA concentration, purity, and  
338 integrity were assessed by NanoDrop (Thermo Fisher Scientific Inc.) and Agilent Bioanalyzer.  
339 RNA-seq libraries were constructed from 1 µg total RNA using the Illumina TruSeq Stranded

340 mRNA LT Sample Prep Kit according to the manufacturer's protocol. Barcoded libraries were  
341 pooled and sequenced on the Illumina HiSeq 2500 generating 50 bp paired end reads. FASTQ  
342 files were processed using the VIPER workflow<sup>56</sup>. Read alignment to human genome build hg19  
343 was performed with STAR<sup>57</sup>. Cufflinks was used to assemble transcript-level expression data  
344 from filtered alignments<sup>58</sup>. Differential gene expression analysis (NEPC vs. PRAD) was  
345 conducted using DESeq2<sup>48</sup>.

346

### 347 **H3K27ac HiChIP**

348 Pulverized frozen tissue from LuCaP 173.1 was fixed with 1% formaldehyde in PBS at  
349 room temperature for 10 minutes as previously described<sup>38</sup>. Sample was incubated in lysis  
350 buffer and digested with Mbol (NEB) for 4 hours. After 1 hour of biotin incorporation with biotin  
351 dATP, the sample was ligated using T4 DNA ligase for 4 hours. Chromatin was sheared using  
352 140 PIP, 5% duty cycle, and 200 cycles/burst for 8 minutes in shearing buffer composed of 1%  
353 NP-40, 0.5% sodium deoxycholate, and 0.1% SDS in PBS (LNCaP) or using 100 PIP, 5% duty  
354 cycle, 200 cycles/burst for 3 minutes in 1% SDS, 50mM Tris (pH 8.1), and 5mM EDTA (LuCaP  
355 173.1). ChIP was then performed using H3K27Ac antibody (Diagenode, C1541019)<sup>59</sup>.

356 Immunoprecipitated sample was pulled down with streptavidin C1 beads (Life  
357 Technologies) and treated with Transposase (Illumina). Amplification was performed for the  
358 number of cycles required to reach 1/3 of the maximal fluorescence on qPCR plot with SYBR®  
359 Green I(Life Technologies). Libraries were sequenced using 150-base paired end reads on the  
360 Illumina platform (Novogene).

361

### 362 *Alignment and filtering using HiC-Pro*

363 We processed paired-end fastq files using HiC-Pro<sup>60</sup> to generate intra- and inter-  
364 chromosomal contact maps. The reads were first trimmed to remove adaptor sequences using  
365 Trim Galore (<https://github.com/FelixKrueger/TrimGalore>). Default settings from HiC-Pro were  
366 used to align reads to the hg19 human genome, assign reads to Mbol restriction fragments, and  
367 remove duplicate reads. Only uniquely mapped valid read pairs involving two different restriction  
368 fragments were used to build the contact maps.

369

### 370 *FitHiChIP*

371 We applied FitHiChIP<sup>61</sup> for bias-corrected peak calling and DNA loop calling.  
372 We used MACS2 broadPeak peak calls from H3K27ac ChIP-seq in LuCaP 173.1 (NEPC).  
373 44,609 peaks were called at a q-value < 0.01. We used a 5Kb resolution and considered only

374 interactions between 5kb-3Mb. We used peak-to-peak (stringent) interactions for the global  
375 background estimation of expected counts (and contact probabilities for each genomic  
376 distance), and peak-to-all interactions for the foreground, meaning at least one anchor must  
377 overlap a H3K27ac peak. The corresponding FitHiChIP options specified are “IntType=3” and  
378 “UseP2PBackgrnd=1”.

379

### 380 *Assignment of enhancer-promoter interactions using H3K27ac HiChIP data*

381 NCBI RefSeq genes (hg19) were downloaded from the UCSC genome table browser  
382 (<https://genome.ucsc.edu/cgi-bin/hgTables>). Only uniquely mapping genes were considered.  
383 The longest transcript was selected for genes with multiple annotated transcripts. We searched  
384 for H3K27ac HiChIP loops with one anchor (defined with a 5kb window) overlapping a region  
385 between 0 and 5kb upstream of a gene transcriptional start site. We selected subset of these  
386 loops for which the second anchor (with a 5kb window) overlapped with H3K27ac peaks  
387 identified by ChIP-seq in LuCaP 173.1 (NEPC) or with NEPC-enriched H3K27ac peaks (Ne-  
388 CREs). Gene promoters and distal H3K27ac peaks / Ne-CREs were considered looped if each  
389 overlapped with an anchor of the same high-confidence H3K27ac HiChIP loop(s). To examine  
390 the association of regulatory element looping with gene expression, genes were binned by the  
391 number of distinct, looped Ne-CREs or H3K27ac peaks. Differential expression between NEPC  
392 and PRAD LuCaP PDXs, as assessed by DESeq2 analysis of LuCaP RNA-seq data, was  
393 plotted for genes in each bin. Wilcoxon rank-sum  $p$ -values were calculated for differential  
394 expression of genes looped to one versus two or more H3K27ac/Ne-CRE peaks. A  $p$ -value <  
395 0.01 was considered significant.

396

### 397 **Master transcription factor analysis**

#### 398 *Super-enhancer ranking analyses*

399 Enhancer and super-enhancer (SE) calls were obtained using the Rank Ordering of  
400 Super-enhancer (ROSE2) algorithm<sup>12</sup>. We selected SEs assigned to transcription factors  
401 (TFs)<sup>62,63</sup>, and for each sample, we obtained the ranks of all TF SEs. Considering only the top  
402 5% TFs by median ranking in NEPC or PRAD, we applied a one-sided Mann–Whitney U test to  
403 identify lineage-enriched TF SEs (FDR = 10%).

404

#### 405 *Clique enrichment and clustering analysis*

406 Clique enrichment scores (CESs) for each TF were calculated using clique assignments  
407 from Coltron<sup>64</sup>. Coltron assembles transcriptional regulatory networks (cliques) based on H3K27

408 acetylation and TF binding motif analysis. The clique enrichment score for a given TF is the  
409 number of cliques containing the TF divided by the total number of cliques. We incorporated  
410 ATAC-seq data to restrict the motif search to regions of open chromatin. Using the CES, we  
411 performed clustering (distance = Canberra, agglomeration method = ward.D2) considering only  
412 TFs that appear in cliques in at least 80% of the samples in at least one lineage group (4 out of  
413 5 NEPC and 11 out of 14 PRAD).

414

#### 415 *Motif enrichment at super-enhancers with loops to the FOXA1 locus*

416 H3K27ac HiChIP data were used to select distal SEs that form three-dimensional  
417 contacts with the *FOXA1* locus. We used the Coltron algorithm to search for TF motifs in ATAC-  
418 seq peaks within these SEs. We considered all TFs that were categorized as expressed by  
419 Coltron based on H3K27ac levels at the TF gene locus. Motif enrichment for a TF was  
420 calculated as the total number of non-overlapping base pairs (bp) covered by the TF motif,  
421 divided by the summed length (in bp) of the SEs. Values in the heatmap legend correspond to  
422 percent coverage (i.e., the largest value corresponds to 0.4%).

423

#### 424 **FOXA1 mutational profiling**

425 *FOXA1* mutational status was assessed from exome sequence data (62x-110X depth of  
426 coverage). Each LuCaP PDX was sequenced using the Illumina Hi-seq platform with 100 bp  
427 paired-end reads. Hybrid capture was performed SeqCapV3. Mouse genome subtraction was  
428 performed using the mm10 genome build and reads were aligned to human reference genome  
429 hg19. For sequence analysis, bam files processed as per Genome Analysis Toolkit (GATK) best  
430 practice guideline<sup>65</sup>. Mutation pathogenicity was annotated using Clinvar, OncoKb and Civic. We  
431 Used MuTect1 and Unified Genotyper for mutation calls. Copy number was derived using the  
432 Sequenza R package.

433

#### 434 **FOXA1 siRNA knock-down**

435 WCM154 organoids were cultured and maintained as previously described<sup>19</sup>. Organoids  
436 were dissociated to single cells using TrypLE (ThermoFisher). One million cells were  
437 resuspended in 20µl of electroporation buffer (BTXpress) and mixed with 60 pmole of control or  
438 FOXA1 On-target pool siRNA (Dharmacon). Then organoid-siRNA mixtures were transferred to  
439 a 16-well Nucleocuvette<sup>TM</sup> Strip and nucleofection was performed in a 4D-Nucleofector  
440 (Lonza). Following nucleofection, 10<sup>5</sup> organoids cells were grown in a 12-well plate coated with  
441 1% collagen I (ThermoFisher) for 7 days. Both adherent and floating cells were collected and

442 stained with 0.4% trypan blue solution (ThermoFisher). Total cell numbers were measured by a  
443 hemocytometer. Cell proliferation with FOXA1 knock-down was normalized to control siRNA  
444 cells.

445

#### 446 **FOXA1 shRNA knock-down**

447 LNCaP, LNCaP 42D, and LNCaP 42F cells were seeded in parallel 6-well plates at  
448 500k, 500k, or 100k, respectively. 24 hours later, cells were infected with lentivirus containing  
449 shRNAs targeting GFP control or *FOXA1*. 48 hours following infection, equal cell numbers were  
450 seeded, and proliferation was assayed 6 days later using a Vi-Cell. 72 hours following infection,  
451 a second plate infected in parallel was harvested for immunoblotting. The target sequence  
452 against GFP was CCACATGAAGCAGCAGCTT (shGFP). The target sequences against  
453 FOXA1 were GCGTACTACCAAGGTGTGTAT (shFOXA1-1) and  
454 TCTAGTTTGTGGAGGGTTAT (shFOXA1-2).

455

#### 456 **FOXA1 CRISPR-Cas9 knock-out**

457 Blasticidin-resistant Cas9 positive LNCaP, LNCaP 42D, and LNCaP 42F cells were  
458 cultured in 20µg/mL blasticidin (Thermo Fisher Scientific, NC9016621) for 72 hours to select for  
459 cells with optimal Cas9 activity. LNCaP, LNCaP 42D, and LNCaP 42F, PC3M cells were seeded  
460 in parallel 6-well plates at 300k, 300k, 300k, or 60k, respectively. Cells were infected after 24  
461 hours with lentiviruses expressing sgRNAs targeting GFP control or *FOXA1*. Cells were subject  
462 to puromycin selection and harvested for immunoblot after 3 days. 6 days following selection,  
463 cell viability was determined using a Vi-Cell. The target sequences against GFP were  
464 AGCTGGACGGCGACGTAAA (sgGFP1) and GCCACAAGTTCAGCGTGTCG (sgGFP2). The  
465 target sequences against FOXA1 were GTTGGACGGCGCGTACGCCA (sgFOXA1-1),  
466 GTAGTAGCTGTTCCAGTCGC (sgFOXA1-2), CAGCTACTACGCAGACACGC (sgFOXA1-3),  
467 and ACTGCGCCCCCATAAGCTC (sgFOXA1-4).

468

#### 469 **Western Blots**

470 For WCM154 Western blots, cell pellets were lysed in RIPA buffer (MilliporeSigma, 20-  
471 188) supplemented with Protease/Phosphatase Inhibitor Cocktail (Cell Signaling Technology,  
472 5872S). Protein concentrations were assayed with a Pierce BCA Protein Assay Kit (Thermo  
473 Fisher Scientific, PI23225), and protein was subsequently denatured in NuPAGE LDS sample  
474 buffer (Thermo Fisher Scientific, NP0007) containing 5% β-Mercaptoethanol. 13µg of each  
475 protein sample was loaded onto NuPAGE 4-12% Bis-Tris Protein gels (Thermo Fisher

476 Scientific), and samples were run in NuPAGE MOPS SDS Running Buffer (Thermo Fisher  
477 Scientific, NP0001). Following electrophoresis, proteins were transferred to nitrocellulose  
478 membranes via an iBlot apparatus (Thermo Fisher Scientific). After blocking in Odyssey  
479 Blocking Buffer (LI-COR Biosciences, 927-70010) for one hour at room temperature,  
480 membranes were cut and incubated in primary antibodies diluted 1:1000 in Odyssey Blocking  
481 Buffer overnight at 4°C. The next morning, membranes were washed three times with  
482 Phosphate-Buffer Saline, 0.1% Tween (PBST) and then incubated with fluorescent anti-rabbit  
483 secondary antibodies (Thermo Fisher Scientific, NC9401842) for one hour at room temperature.  
484 Membranes underwent five PBST washes and were then imaged using an Odyssey Imaging  
485 System (LI-COR Biosciences). Primary antibodies used include FOXA1 (Cell Signaling  
486 Technology, 58613S) and  $\beta$ -actin (Cell Signaling Technology, 8457L).

487 For LNCaP, LNCaP 42D, and LNCaP 42F Western Blots, cell lysate was extracted using  
488 RIPA lysis buffer (Sigma) containing protease inhibitor (Roche) and phosphatase inhibitor  
489 (ThermoFisher). 50  $\mu$ g of protein was subjected to a 4-15% Mini-PROTEAN Precast  
490 electrophoresis gel (Bio-Rad) then transferred to 0.22  $\mu$ m nitrocellulose membrane (Bio-Rad)  
491 and blocked in 5% blotting grade blocker (Bio-Rad). Membranes were incubated with primary  
492 antibodies overnight (FOXA1, Abcam, 1:2000, ab23738; Synaptophysin, Cell Marque, 1:5000,  
493 MRQ-40; INSM1, Santa Cruz, 1:2000, sc-377428; FOXA2, Abcam; 1:2500, ab108422;  
494 Chromogranin A, Abcam, 1:2000, ab15160; Vinculin Cell signaling, 1:5000, #13901).  
495 Membranes were then washed in 1x Tris-buffered saline with 0.5% Tween-20 (Boston  
496 BioProducts) and incubated with secondary antibodies (mouse, Bio-Rad, 1:2500; rabbit, Bio-  
497 Rad, 1:2500). Western HRP substrate kit was used to detect chemiluminescent signal (Millipore,  
498 Classico).

499

## 500 **Analysis of FOXA1 binding sites across prostate cancer states**

501 FOXA1 cistromes were compared across different states of prostate cancer progression  
502 (normal prostate, prostate-localized adenocarcinoma, PDXs derived from metastatic castration  
503 resistant prostate cancer, and PDXs derived from NEPC). FOXA1 ChIP from normal prostate  
504 tissue and prostate-localized adenocarcinoma will be reported separately (Pomerantz *et al.*,  
505 submitted). For normal prostate tissue FOXA1 ChIP, tissue cores were obtained from regions of  
506 prostatectomy specimens with dense epithelium and no evidence of neoplasia on review by a  
507 genitourinary pathologist. PDX samples used are listed in Table S1. PDXs derived from  
508 localized prostate cancer were excluded from this analysis. Because the normal prostate and  
509 localized adenocarcinoma samples were sequenced with single-end sequencing with an

510 average of ~20 million reads, paired-end sequencing data from LuCaP PDXs were down-  
511 sampled to 20M reads, using a single end trimmed to 75 base-pairs using seqtk  
512 (<https://github.com/lh3/seqtk>).

513 Pairwise comparisons were made between normal prostate (N=5) and localized PRAD  
514 (N=5), localized PRAD and metastatic PRAD PDXs (N=11), and metastatic PRAD PDXs and  
515 NEPC PDXs (N=5) using DESeq2 as described above. Peaks were considered significantly  
516 different between groups at a log<sub>2</sub> |fold-change| threshold of 2 and FDR-adjusted *p*-value  
517 threshold of 0.001. “Shared” peaks were defined as the intersection of all peaks that were  
518 present in each group but not significantly different in any comparison.

519

## 520 **Immunohistochemistry**

521 Immunohistochemistry was performed on tissue microarray (TMA) sections. TMA slides  
522 were stained for FOXA1 (Abcam ab170933, 1:100 dilution with 10 mM NaCitrate antigen  
523 retrieval) and FOXA2 (Abcam ab108422, 1:500 dilution with 10 mM NaCitrate antigen retrieval)  
524 using a standard procedure<sup>66</sup>. Rabbit IgG was used as a negative control. Nuclear staining  
525 intensity was assigned levels 0, 1+, 2+, or 3+ and H-scores were calculated as: [1 x (% of 1+  
526 cells) + 2 x (% of 2+ cells) + 3 x (% of 3+ cells)]. Evaluations were performed in a blinded  
527 fashion.

528

## 529 **ASCL1/NKX2-1 overexpression in LNCaP**

### 530 *Transduction of LNCaP cells with ASCL1 and NKX2-1*

531 The open reading frames of ASCL1 and NKX2-1 were cloned into the pLX\_TRC302  
532 lentiviral expression vector (Broad Institute) using the gateway recombination system. A  
533 construct expressing eGFP (pLX\_TRC302\_GFP) was used as a negative control. Viruses were  
534 generated by transfecting 293T cells with packaging vectors pVsVg and pDelta8.9. Supernatant  
535 was collected after 48 hours. LNCaP cells were transduced in the presence of 4µg/ml polybrene  
536 and harvested after 3 days for RNA-seq, ATAC-seq, and ChIP-seq.

537 ChIP seq was performed as described above, using 10-15 million cells fixed with 1%  
538 paraformaldehyde for 10 minutes at room temperature, followed by quenching with glycine.  
539 RNA was isolated using QIAGEN RNeasy Plus Kit and cDNA synthesized using Clontech RT  
540 Advantage Kit. Quantitative PCR was performed on a Quantstudio 6 using SYBR green. The  
541 following primers were used for qRT-PCR:

|                |                       |
|----------------|-----------------------|
| AR qRT-PCR fwd | GTGTCAAAGCGAAATGGGC   |
| AR qRT-PCR rev | GCTTCATCTCCACAGATCAGG |



|                   |                         |
|-------------------|-------------------------|
| ASCL1 qRT-PCR fwd | CTACTCCAACGACTTGA ACTCC |
| ASCL1 qRT-PCR rev | AGTTGGTGAAGTCGAGAAGC    |
| GAPDH qRT-PCR fwd | CATGAGAAGTATGACAACAGCCT |
| GAPDH qRT-PCR rev | AGTCCTTCCACGATACCAAAGT  |
| SOX2 qRT-PCR fwd  | CACACTGCCCTCTCAC        |
| SOX2 qRT-PCR rev  | TCCATGCTGTTTCTTACTCTCC  |
| SYP qRT-PCR fwd   | AGACAGGGAACACATGCAAG    |
| SYP qRT-PCR rev   | TCTCCTTAAACACGAACCACAG  |

## 542 **Analysis of promoter H3K4 and H3K27 trimethylation**

543 Refseq gene coordinates (hg19) were compiled, selecting the longest isoform where  
544 multiple were annotated. Normalized tag counts from H3K27me3 and H3K4me3 ChIP-seq  
545 within 2kb of each transcriptional start site (TSS) were calculated for each sample, then  
546 averaged across multiple samples in each group (five NEPC PDXs, five PRAD PDXs, three  
547 normal prostates; Pomerantz et al., submitted). Contours were calculated using the R function  
548 `geom_density_2d` from the `ggplot2` package; they represent the 2d kernel density estimation for  
549 all included transcriptional start sites. Gene promoters were assigned “active”, “bivalent”,  
550 “unmarked”, and “repressed” annotations based on H3K4me3 and H3K27me3 levels. High/low  
551 cutoffs for these marks were determined as follows. First, the H3K4me3 normalized tag counts  
552 near each TSS were fit to two normal distributions using the `normalmixEM` R function from the  
553 `mixtools` R package. The cutoff between H3K4me3-high and -low was set at four standard  
554 deviations below the mean value of the H3K4me3-high distribution. Next, the normalized  
555 H3K27me3 tag counts near H3K4me3-high TSSs were fit to two normal distributions. The cutoff  
556 for H3K27me3-high promoters was set at four standard deviations above the mean value of the  
557 H3K27me3-low distribution. The Pearson Chi-squared test was used to quantify significance of  
558 enrichment of NEPC-upregulated genes in the “bivalent” quadrant compared to “repressed” or  
559 “unmarked” quadrants. NEPC-upregulated genes were defined as those with  $\log_2$  fold-change >  
560 3 and adjusted  $p$ -value <  $1 \times 10^{-6}$  in NEPC vs. PRAD. The results of the analysis were robust to  
561 using other  $p$ -value and differential expression thresholds.

562

## 563 **Methylation analysis of normal prostate**

564 Whole genome bisulfite sequencing data from histologically normal prostate tissue were  
565 reported previously<sup>67</sup> and processed as previously described<sup>68</sup>. CpG methylation at indicated  
566 sites was visualized using `deepTools`<sup>46</sup>.

567

568 **Data Availability:**

569 Sequence data in fastq format from this study will be deposited in GEO. Requests for LuCaP  
570 PDXs should be directed to Dr. Eva Corey (ecorey@uw.edu)

571

572 **Acknowledgements:**

573 This work was supported by the PNW Prostate Cancer SPORE P50 CA097186, DOD  
574 W81XWH-17-1-0415, P01 CA163227, R01 CA233863, The Prostate Cancer Foundation, The  
575 Richard M. Lucas Foundation, the European Union's Horizon 2020 Research and Innovation  
576 programme under the Marie Skłodowska-Curie grant agreement No. 754490, the National  
577 Cancer Institute (T32CA009172), and by Rebecca and Nathan Milikowsky. We would like to  
578 thank the patients who generously donated tissue that made this research possible.

579

580 **Author contributions:**

581 S.C.B. analyzed ChIP-seq data and wrote the manuscript. X.Q. assisted with ChIP-seq data  
582 analysis. D.Y.T., J.H., and T.A. performed ASCL1/NKX2-1 overexpression experiments. S.Y.K.  
583 performed FOXA1 siRNA experiments under supervision of H.B. J.H., T.A., R.A., and S.A.  
584 performed FOXA1 shRNA and CRISPR experiments. E.O., C.B., and S.A.A. performed ChIP-  
585 seq experiments. J.-H.S. performed HiChIP experiments. C.G. and B.P analyzed HiChIP data.  
586 R.I.C. and M.A.S.F. performed core regulatory analysis under supervision of K.L. P.C. and K.L.  
587 performed ATAC-seq under supervision of H.W.L. and M.B. M.H. and A.N. assisted with  
588 procurement of clinical samples. J.E.B. and K. K. assisted with analysis of WGBS methylation  
589 data. L.B. performed immunohistochemistry experiments. I.M.C., and A.K. performed RNA-seq  
590 under the supervision of P.S.N. H.H.N., C.M., and E.C. provided LuCaP PDXs. E.C., M.M.P.  
591 and M.L.F. supervised the project.

592

593 **Competing interests statement:** W.C.H. is a consultant for Thermo Fisher, Solasta Ventures,  
594 iTeos, Frontier Medicines, Tyra Biosciences, MPM Capital, KSQ Therapeutics, and Paraxel and  
595 is a founder of KSQ Therapeutics.

596 **References:**

- 597 1. Aggarwal, R. *et al.* Clinical and genomic characterization of treatment-emergent small-cell  
598 neuroendocrine prostate cancer: a multi-institutional prospective study. *J. Clin. Oncol.* **36**,  
599 2492–2503 (2018).
- 600 2. Sequist, L. V. *et al.* Genotypic and histological evolution of lung cancers acquiring  
601 resistance to EGFR inhibitors. *Sci. Transl. Med.* **3**, 75ra26 (2011).
- 602 3. Zaret, K. S. & Carroll, J. S. Pioneer transcription factors: establishing competence for gene  
603 expression. *Genes Dev.* **25**, 2227–2241 (2011).
- 604 4. Friedman, J. & Kaestner, K. The Foxa family of transcription factors in development and  
605 metabolism. *Cell. Mol. Life Sci.* **63**, 2317–28 (2006).
- 606 5. Scher, H. *et al.* Increased survival with enzalutamide in prostate cancer after chemotherapy.  
607 *N. Engl. J. Med.* **367**, 1187–1197 (2012).
- 608 6. de Bono, J. S. *et al.* Abiraterone and increased survival in metastatic prostate cancer. *N.*  
609 *Engl. J. Med.* **364**, 1995–2005 (2011).
- 610 7. Bluemn, E. *et al.* Androgen Receptor pathway-independent prostate cancer is sustained  
611 through FGF signaling. *Cancer Cell* **32**, 474-489.e6 (2017).
- 612 8. Beltran, H. *et al.* Divergent clonal evolution of castration resistant neuroendocrine prostate  
613 cancer. *Nat. Med.* **22**, 298–305 (2016).
- 614 9. Davies, A. H., Beltran, H. & Zoubeidi, A. Cellular plasticity and the neuroendocrine  
615 phenotype in prostate cancer. *Nat. Rev. Urol.* **15**, 271–286 (2018).
- 616 10. Nguyen, H. *et al.* LuCaP prostate cancer patient-derived xenografts reflect the molecular  
617 heterogeneity of advanced disease and serve as models for evaluating cancer therapeutics.  
618 *Prostate* **77**, 654–671 (2017).
- 619 11. Mu, P. *et al.* SOX2 promotes lineage plasticity and antiandrogen resistance in TP53- and  
620 RB1-deficient prostate cancer. *Science* **355**, 84–88 (2017).
- 621 12. Whyte, W. A. *et al.* Master transcription factors and mediator establish super-enhancers at  
622 key cell identity genes. *Cell* **153**, 307–319 (2013).
- 623 13. Lin, C. *et al.* Active medulloblastoma enhancers reveal subgroup-specific cellular origins.  
624 *Nature* **530**, 57 (2016).
- 625 14. Ott, C. J. *et al.* Enhancer architecture and essential core regulatory circuitry of chronic  
626 lymphocytic leukemia. *Cancer Cell* **34**, 982-995.e7 (2018).
- 627 15. Qi, J. *et al.* Siah2-dependent concerted activity of HIF and FoxA2 regulates formation of  
628 neuroendocrine phenotype and neuroendocrine prostate tumors. *Cancer Cell* **18**, 23–38  
629 (2010).

- 630 16. Parolia, A. *et al.* Distinct structural classes of activating FOXA1 alterations in advanced  
631 prostate cancer. *Nature* **571**, 413–418 (2019).
- 632 17. Jaenisch, R. & Young, R. Stem cells, the molecular circuitry of pluripotency and nuclear  
633 reprogramming. *Cell* **132**, 567–582 (2008).
- 634 18. Bishop, J. L. *et al.* The master neural transcription factor BRN2 is an Androgen Receptor-  
635 suppressed driver of neuroendocrine differentiation in prostate cancer. *Cancer Discov.* **7**,  
636 54–71 (2017).
- 637 19. Puca, L. *et al.* Patient derived organoids to model rare prostate cancer phenotypes. *Nat.*  
638 *Commun.* **9**, 2404 (2018).
- 639 20. Donaghey, J. *et al.* Genetic determinants and epigenetic effects of pioneer-factor  
640 occupancy. *Nat. Genet.* **50**, 250–258 (2018).
- 641 21. Ousset, M. *et al.* Multipotent and unipotent progenitors contribute to prostate postnatal  
642 development. *Nat. Cell. Biol.* **14**, 1131 (2012).
- 643 22. Pignon, J.-C. *et al.* p63-expressing cells are the stem cells of developing prostate, bladder,  
644 and colorectal epithelia. *Proc. Natl. Acad. Sci.* **110**, 8105–8110 (2013).
- 645 23. Hon, G. C. *et al.* Epigenetic memory at embryonic enhancers identified in DNA methylation  
646 maps from adult mouse tissues. *Nat. Genet.* **45**, 1198–1206 (2013).
- 647 24. Jadhav, U. *et al.* Extensive recovery of embryonic enhancer and gene memory stored in  
648 hypomethylated enhancer DNA. *Mol. Cell* **74**, 542-554.e5 (2019).
- 649 25. Bernstein, B. E. *et al.* A bivalent chromatin structure marks key developmental genes in  
650 embryonic stem cells. *Cell* **125**, 315–26 (2006).
- 651 26. Jadhav, U. *et al.* Acquired tissue-specific promoter bivalency is a basis for PRC2 necessity  
652 in adult cells. *Cell* **165**, 1389–1400 (2016).
- 653 27. Mohn, F. *et al.* Lineage-specific polycomb targets and de novo DNA methylation define  
654 restriction and potential of neuronal progenitors. *Mol. Cell* **30**, 755–766 (2008).
- 655 28. Schoenherr, C. & Anderson, D. The neuron-restrictive silencer factor (NRSF): a coordinate  
656 repressor of multiple neuron-specific genes. *Science* **267**, 1360–3 (1995).
- 657 29. Park, J. *et al.* Reprogramming normal human epithelial tissues to a common, lethal  
658 neuroendocrine cancer lineage. *Science* **362**, 91–95 (2018).
- 659 30. Ku, S. *et al.* Rb1 and Trp53 cooperate to suppress prostate cancer lineage plasticity,  
660 metastasis, and antiandrogen resistance. *Science* **355**, 78–83 (2017).
- 661 31. Kim, J. *et al.* FOXA1 inhibits prostate cancer neuroendocrine differentiation. *Oncogene* **36**,  
662 4072–4080 (2017).

- 663 32. Borromeo, M. D. *et al.* ASCL1 and NEUROD1 reveal heterogeneity in pulmonary  
664 neuroendocrine tumors and regulate distinct genetic programs. *Cell. Rep.* **16**, 1259–1272  
665 (2016).
- 666 33. Balanis, N. G. *et al.* Pan-cancer convergence to a small-cell neuroendocrine phenotype that  
667 shares susceptibilities with hematological malignancies. *Cancer Cell* **36**, 17-34.e7 (2019).
- 668 34. Beshiri, M. L. *et al.* A PDX/organoid biobank of advanced prostate cancers captures  
669 genomic and phenotypic heterogeneity for disease modeling and therapeutic screening.  
670 *Clin. Cancer Res.* **24**, 4332–4345 (2018).
- 671 35. Gleave, A. M., Ci, X., Lin, D. & Wang, Y. A synopsis of prostate organoid methodologies,  
672 applications, and limitations. *The Prostate* **80**, 518–526 (2020).
- 673 36. Kanan, A. D., Corey, E., Vêncio, R. Z. N., Ishwar, A. & Liu, A. Y. Lineage relationship  
674 between prostate adenocarcinoma and small cell carcinoma. *BMC Cancer* **19**, 518 (2019).
- 675 37. Labrecque, M. P. *et al.* Molecular profiling stratifies diverse phenotypes of treatment-  
676 refractory metastatic castration-resistant prostate cancer. *J. Clin. Invest.* **129**, 4492–4505  
677 (2019).
- 678 38. Pomerantz, M. M. *et al.* The androgen receptor cistrome is extensively reprogrammed in  
679 human prostate tumorigenesis. *Nat. Genet.* **47**, 1346–1351 (2015).
- 680 39. Johnson, D. S., Mortazavi, A., Myers, R. M. & Wold, B. Genome-wide mapping of in vivo  
681 protein-DNA interactions. *Science* **316**, 1497–1502 (2007).
- 682 40. Corces, M. R. *et al.* An improved ATAC-seq protocol reduces background and enables  
683 interrogation of frozen tissues. *Nat. Methods* **14**, 959–962 (2017).
- 684 41. Buenrostro, J., Wu, B., Chang, H. & Greenleaf, W. ATAC-seq: A method for assaying  
685 chromatin accessibility genome-wide. *Curr. Protoc. Mol. Biol.* **109**, 21.29.1-21.29.9 (2015).
- 686 42. Langmead, B., Trapnell, C., Pop, M. & Salzberg, S. L. Ultrafast and memory-efficient  
687 alignment of short DNA sequences to the human genome. *Genome Biol.* **10**, R25 (2009).
- 688 43. Zhang, Y. *et al.* Model-based Analysis of ChIP-Seq (MACS). *Genome Biol.* **9**, R137 (2008).
- 689 44. Cavalcante, R. G. & Sartor, M. A. annotatR: genomic regions in context. *Bioinformatics* **33**,  
690 2381–2383 (2017).
- 691 45. Robinson, J. T. *et al.* Integrative Genomics Viewer. *Nat. Biotechnol.* **29**, 24–26 (2011).
- 692 46. Ramírez, F., Dündar, F., Diehl, S., Grüning, B. A. & Manke, T. deepTools: a flexible platform  
693 for exploring deep-sequencing data. *Nucleic Acids Res.* **42**, W187–W191 (2014).
- 694 47. Köster, J. & Rahmann, S. Snakemake—a scalable bioinformatics workflow engine.  
695 *Bioinformatics* **28**, 2520–2522 (2012).

- 696 48. Love, M. I., Huber, W. & Anders, S. Moderated estimation of fold change and dispersion for  
697 RNA-seq data with DESeq2. *Genome Biol.* **15**, 550 (2014).
- 698 49. McLean, C. Y. *et al.* GREAT improves functional interpretation of cis-regulatory regions.  
699 *Nat. Biotechnol.* **28**, 495–501 (2010).
- 700 50. Layer, R. M. *et al.* GIGGLE: a search engine for large-scale integrated genome analysis.  
701 *Nat. Methods* **15**, 123–126 (2018).
- 702 51. Huang, Y.-H. *et al.* POU2F3 is a master regulator of a tuft cell-like variant of small cell lung  
703 cancer. *Genes Dev.* **32**, 915–928 (2018).
- 704 52. Abraham, B. J. *et al.* Small genomic insertions form enhancers that misregulate oncogenes.  
705 *Nat. Commun.* **8**, 14385 (2017).
- 706 53. ENCODE Project Consortium. An integrated encyclopedia of DNA elements in the human  
707 genome. *Nature* **489**, 57–74 (2012).
- 708 54. Rusan, M. *et al.* Suppression of adaptive responses to targeted cancer therapy by  
709 transcriptional repression. *Cancer Discov.* **8**, 59–73 (2018).
- 710 55. Handoko, L. *et al.* JQ1 affects BRD2-dependent and independent transcription regulation  
711 without disrupting H4-hyperacetylated chromatin states. *Epigenetics* **13**, 410–431 (2018).
- 712 56. Cornwell, M. *et al.* VIPER: Visualization Pipeline for RNA-seq, a Snakemake workflow for  
713 efficient and complete RNA-seq analysis. *BMC Bioinformatics* **19**, 135 (2018).
- 714 57. Dobin, A. *et al.* STAR: ultrafast universal RNA-seq aligner. *Bioinformatics* **29**, 15–21 (2013).
- 715 58. Trapnell, C. *et al.* Differential gene and transcript expression analysis of RNA-seq  
716 experiments with TopHat and Cufflinks. *Nat. Protoc.* **7**, 562–578 (2012).
- 717 59. Mumbach, M. R. *et al.* HiChIP: efficient and sensitive analysis of protein-directed genome  
718 architecture. *Nat. Methods* **13**, 919–922 (2016).
- 719 60. Servant, N. *et al.* HiC-Pro: an optimized and flexible pipeline for Hi-C data processing.  
720 *Genome Biol.* **16**, 259 (2015).
- 721 61. Bhattacharyya, S., Chandra, V., Vijayanand, P. & Ay, F. FitHiChIP: Identification of  
722 significant chromatin contacts from HiChIP data. *bioRxiv* 412833 (2018)  
723 doi:10.1101/412833.
- 724 62. D'Alessio, A. C. *et al.* A systematic approach to identify candidate transcription factors that  
725 control cell identity. *Stem Cell Rep.* **5**, 763–775 (2015).
- 726 63. Lambert, S. A. *et al.* The human transcription factors. *Cell* **172**, 650–665 (2018).
- 727 64. Federation, A. J. *et al.* Identification of candidate master transcription factors within  
728 enhancer-centric transcriptional regulatory networks. *bioRxiv* 345413 (2018)  
729 doi:10.1101/345413.

- 730 65. Van der Auwera, G. A. *et al.* From FastQ data to high confidence variant calls: the Genome  
731 Analysis Toolkit best practices pipeline. *Curr Protoc Bioinformatics* **43**, 11.10.1-11.10.33  
732 (2013).
- 733 66. Nguyen, H. M. *et al.* Cabozantinib inhibits growth of androgen-sensitive and castration-  
734 resistant prostate cancer and affects bone remodeling. *PLoS ONE* **8**, e78881 (2013).
- 735 67. Yu, Y. P. *et al.* Whole-genome methylation sequencing reveals distinct impact of differential  
736 methylations on gene transcription in prostate cancer. *Am. J. Pathol.* **183**, 1960–1970  
737 (2013).
- 738 68. Takeda, D. Y. *et al.* A somatically acquired enhancer of the Androgen Receptor is a  
739 noncoding driver in advanced prostate cancer. *Cell* **174**, 422-432.e13 (2018).
- 740 69. Tsherniak, A. *et al.* Defining a cancer dependency map. *Cell* **170**, 564-576.e16 (2017).
- 741 70. Henry, G. H. *et al.* A cellular anatomy of the normal adult human prostate and prostatic  
742 urethra. *Cell Rep.* **25**, 3530-3542.e5 (2018).
- 743

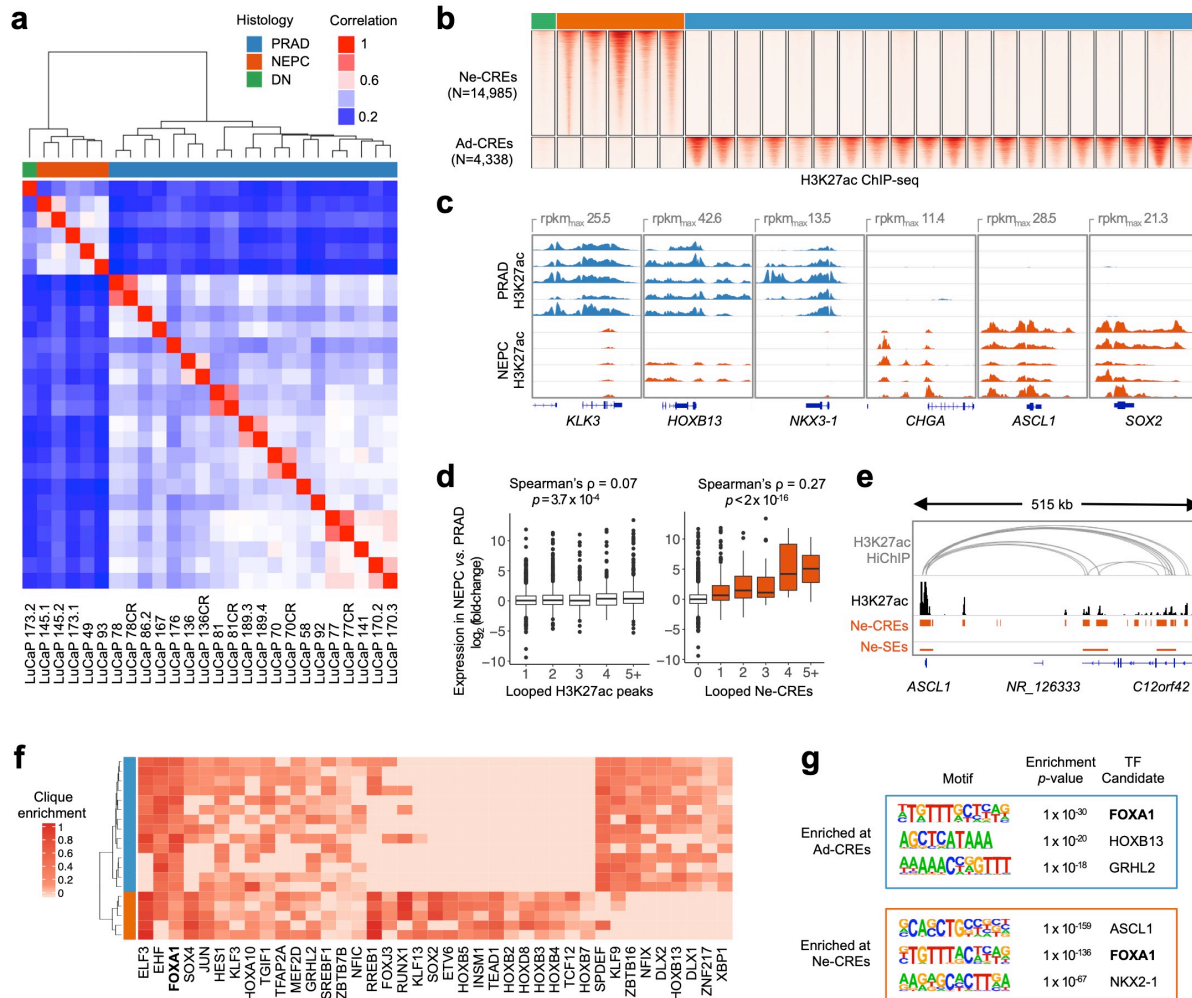

**Figure 1. Epigenomic divergence of PRAD and NEPC.** **a**, Hierarchical clustering of PRAD and NEPC based on sample-to-sample correlation of H3K27ac profiles. “DN” (“double-negative”) indicates a LuCaP PDX without AR or NE marker expression (see also Supplementary Figure 1). **b**, Heatmaps of normalized H3K27ac tag densities at differentially H3K27-acetylated regions ( $\pm 2$ kb from peak center) between NEPC and PRAD. “CREs” signify candidate regulatory elements. **c**, H3K27ac signal near selected prostate-lineage and NEPC genes. Five representative samples from each histology are shown. **d**, Differential expression (NEPC vs. PRAD) of genes with the indicated number of distinct looped H3K27ac peaks (left) or Ne-CREs (right) detected by H3K27ac HiChIP in LuCaP 173.1 (NEPC). Wilcoxon  $p$ -value is indicated for comparison of genes with loops to one Ne-CRE or H3K27ac peak versus two or more. **e**, H3K27ac HiChIP loops in LuCaP 173.1 from ASCL1 to Ne-CREs and NEPC-restricted super-enhancers (Ne-SEs). H3K27ac tag density for LuCaP 173.1 is shown in black. **f**, Candidate master transcription factors in NEPC and PRAD based on regulatory clique enrichment (see methods). **g**, Three most significantly enriched nucleotide motifs present in  $>10\%$  of Ad-CREs or Ne-CREs by *de novo* motif analysis.



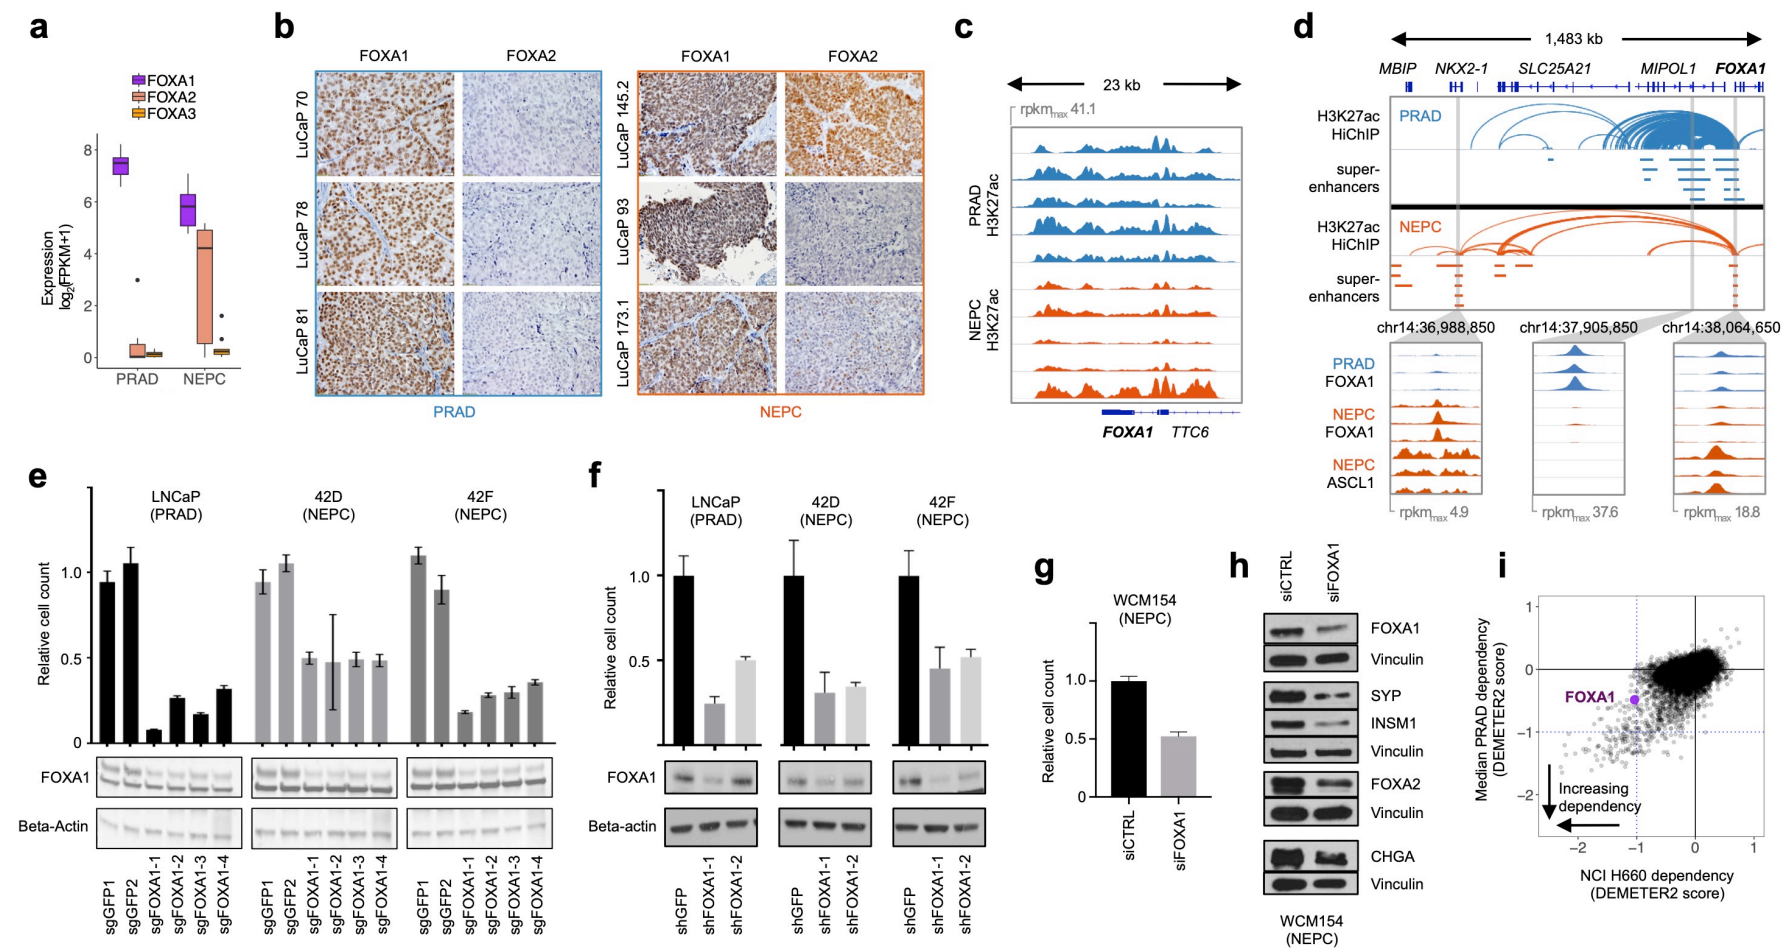

**Figure 2. FOXA1 remains a critical lineage transcription factor in NEPC.** **a**, Transcript expression of FOXA family TFs in LuCaPs PDXs (5 NEPC and 5 PRAD; 2 replicates each). **b**, FOXA1/FOXA2 immunohistochemistry in six representative PDXs. **c**, H3K27ac profiles at *FOXA1* in five representative PRAD and NEPC PDXs. **d**, H3K27ac HiChIP loops near *FOXA1* in LuCaP 173.1 (NEPC) and LNCaP (PRAD). Bars indicate super-enhancers in five representative LuCaPs of each lineage. Blowups show ChIP-seq read pileups for FOXA1 and ASCL1 in PDXs of the indicated lineage. **e-f**, Proliferation of LNCaP and 42D/42F derivatives with inactivation of FOXA1 by CRISPR (e) or shRNA (f). **g-h**, Proliferation (g) and expression of neuroendocrine marker proteins (h) with siRNA knock-down of FOXA1 in the NEPC organoid model WCM154. **i**, Essentiality of genes in NCI-H660 (NEPC) versus PRAD cell lines in a published shRNA screening dataset<sup>69</sup>. More negative DEMETER2 scores indicate greater dependency. The blue lines indicate the median DEMETER2 score for pan-essential genes.

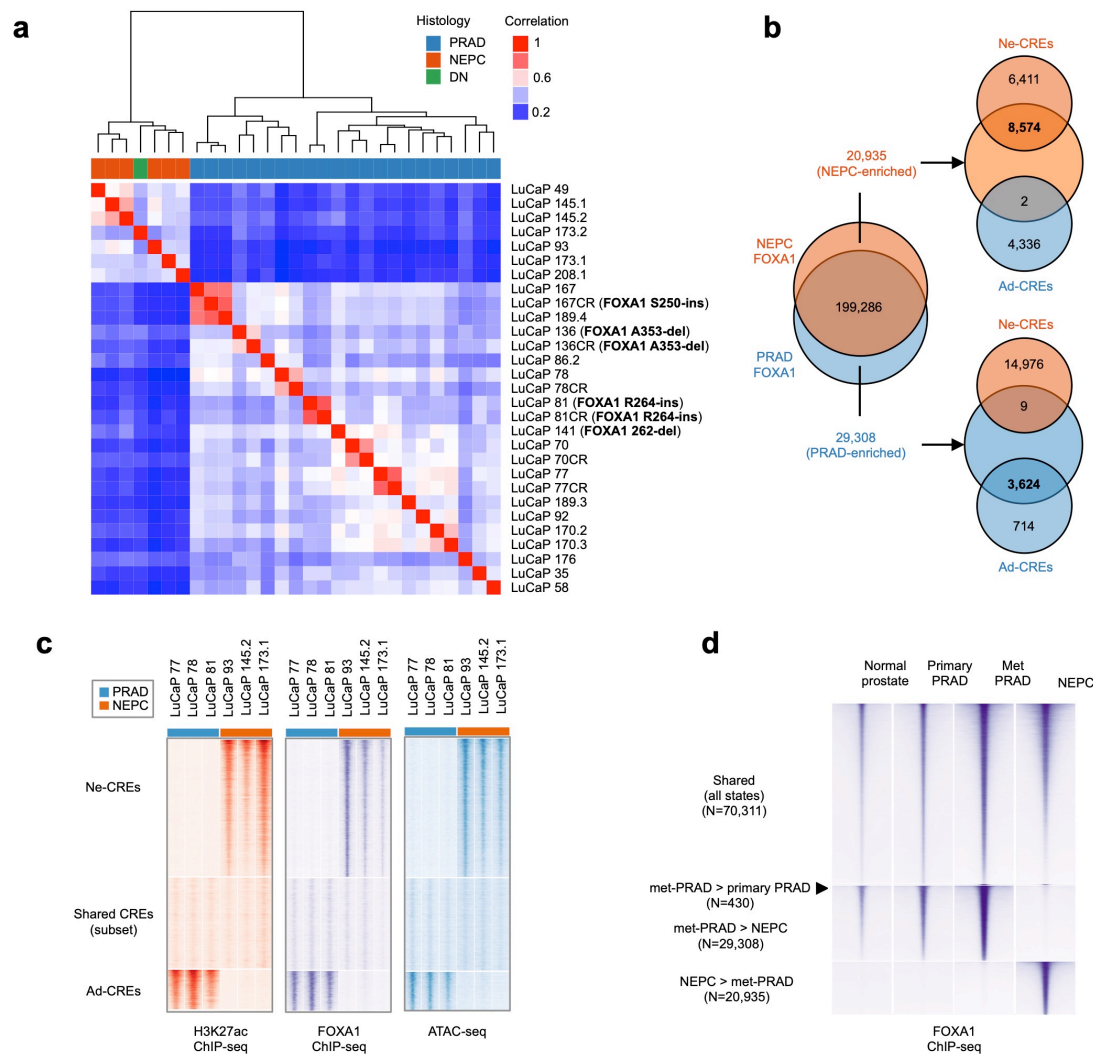

**Figure 3. Reprogramming of the FOXA1 cistrome in NEPC.** **a**, Hierarchical clustering of LuCaP PDXs by FOXA1 binding profiles. “DN” (“double-negative”) indicates a PDX without AR or NE marker expression. FOXA1 mutational status is noted; see also Table S7) **b**, Venn diagram of lineage-enriched and shared FOXA1 binding sites and their overlap with lineage-enriched candidate regulatory elements (Ad-CREs and Ne-CREs). **c**, Normalized tag densities for H3K27ac/FOXA1 ChIP-seq and ATAC-seq at Ne-CREs and Ad-CREs. Three representative NEPC and PRAD PDXs are shown. **d**, Average normalized tag densities for FOXA1 in normal prostate, primary PRAD, and PDXs derived from PRAD metastases (Met PRAD) or NEPC (five samples in each category) at differential FOXA1 binding sites between these groups. There are insufficient differential sites to display (<100) for the Primary PRAD > Met PRAD comparison and the Primary PRAD vs. Normal prostate comparisons.

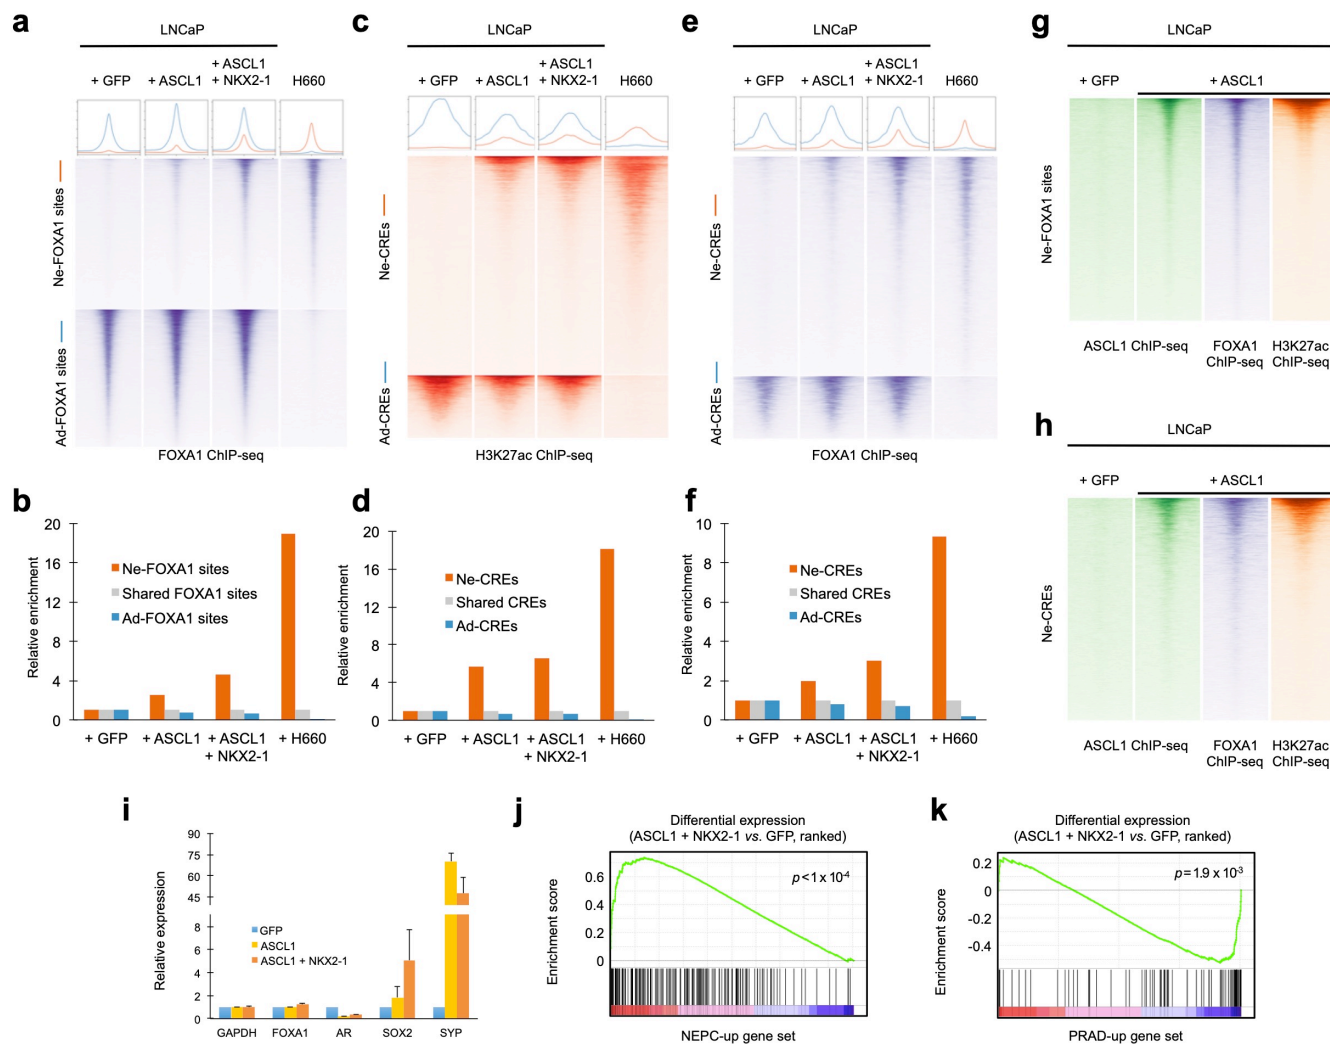

**Figure 4. FOXA1 is extensively redistributed at lineage-specific regulatory elements.** **a**, Normalized ChIP-seq tag density for FOXA1 at NEPC-enriched and PRAD-enriched FOXA1 binding sites under the indicated conditions. Profile plots (top) represent mean tag density at sites depicted in the heatmaps. **b**, Enrichment of FOXA1 peaks for overlap with NEPC-enriched and PRAD-enriched FOXA1 binding sites in the indicated conditions, normalized to FOXA1 peaks shared between PRAD and NEPC. **c-f**, Normalized ChIP-seq tag density for H3K27ac (**c**) and FOXA1 (**e**) at Ne-CREs and Ad-CREs under the indicated experimental conditions. Enrichment of overlap of H3K27ac peaks (**d**) and FOXA1 peaks (**f**) with Ne-CREs and Ad-CREs under the indicated conditions. **g-h** Normalized ChIP-seq tag density for ASCL1, FOXA1, and H3K27ac under the indicated experimental conditions at NEPC-enriched FOXA1 sites (**g**) and Ne-CREs (**h**). **i**, Effect of ASCL1 overexpression on transcript levels of indicated genes, measured by qPCR. Fold-change relative to +GFP condition is shown, using normalization to GAPDH. The average of three biological replicates is shown for each condition. Error bars represent standard deviation. **j-k**, Gene set enrichment analysis of genes upregulated at least 8-fold in LuCaP NEPC (**j**) or PRAD (**k**) at adjusted  $p$ -value  $< 10^{-18}$ . Genes are ranked by differential expression between LNCaP + ASCL1 + NKX2-1 and + GFP conditions based on RNA-seq.

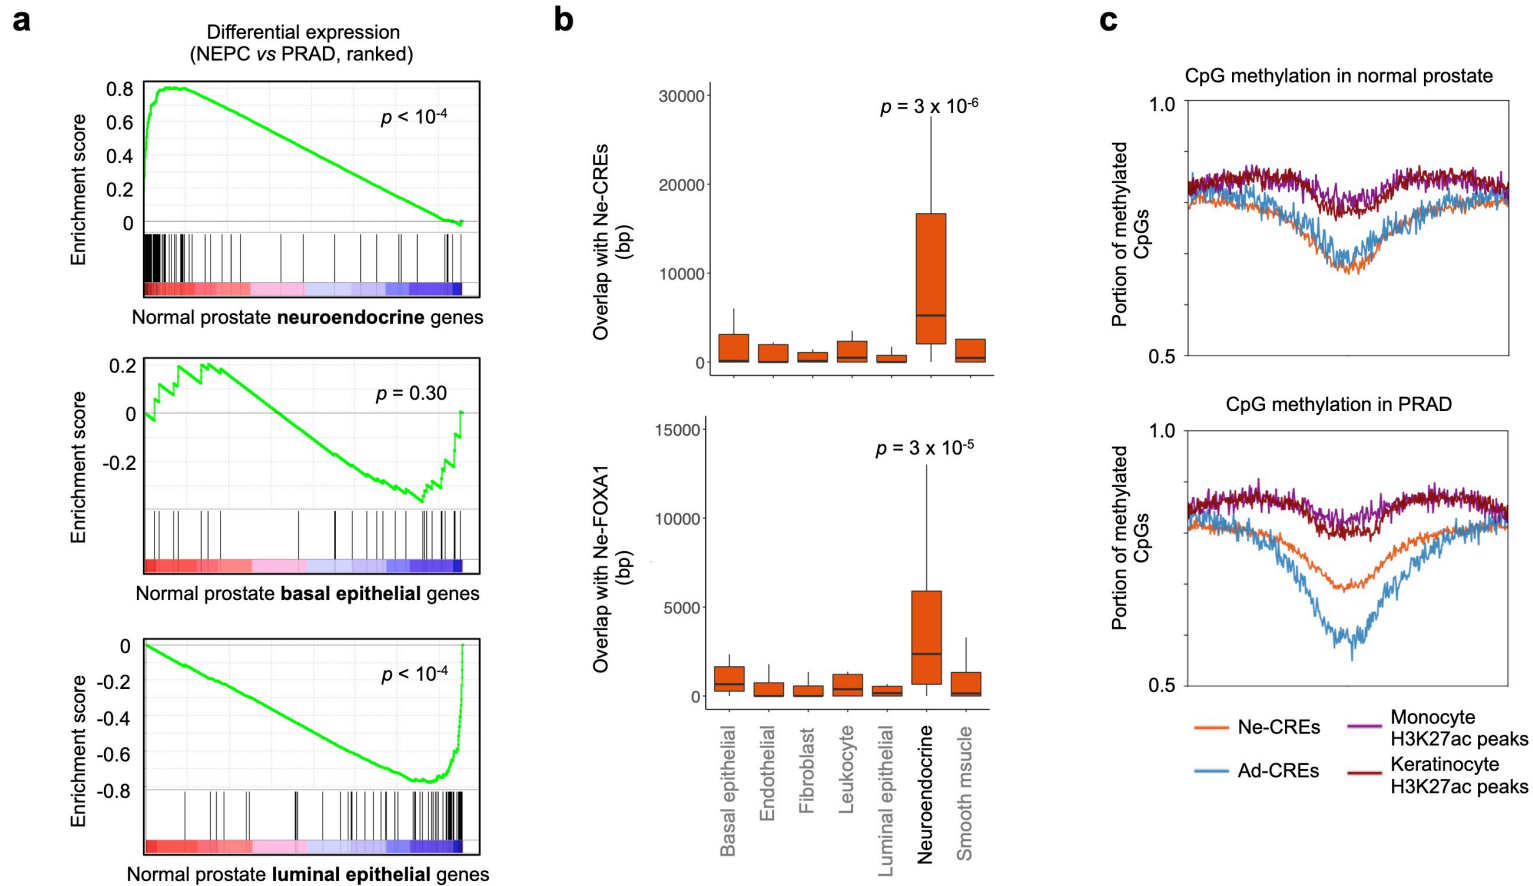

**Figure 5. Gene expression of benign prostate cells compared to NEPC transcriptomes and epigenomes.** **a**, Gene set enrichment analysis of genes specifically expressed in neuroendocrine, basal, and luminal cells from normal prostate<sup>70</sup>. Genes are ranked by differential expression in NEPC and PRAD LuCaP PDXs. **b**, Overlap of NEPC-enriched H3K27ac peaks (Ne-CREs; top) and FOXA1 binding sites (Ne-FOXA1; bottom) with a 200kb window centered on the transcriptional start site of the 20 most significantly differentially expressed genes in each indicated prostate cell type<sup>70</sup>.  $p$ -values correspond to Wilcoxon test of Ne-CRE/Ne-FOXA1 peak overlap near neuroendocrine cell genes versus all other indicated gene categories. **c**, fraction of CpG methylation detected by whole genome bisulfite sequencing in normal prostate tissue and PRAD at Ne-CREs and Ad-CREs. Methylation levels at H3K27ac peaks identified in epithelial keratinocytes or in peripheral blood monocytes are included for comparison. x-axis corresponds to peak center  $\pm 3$ kb.

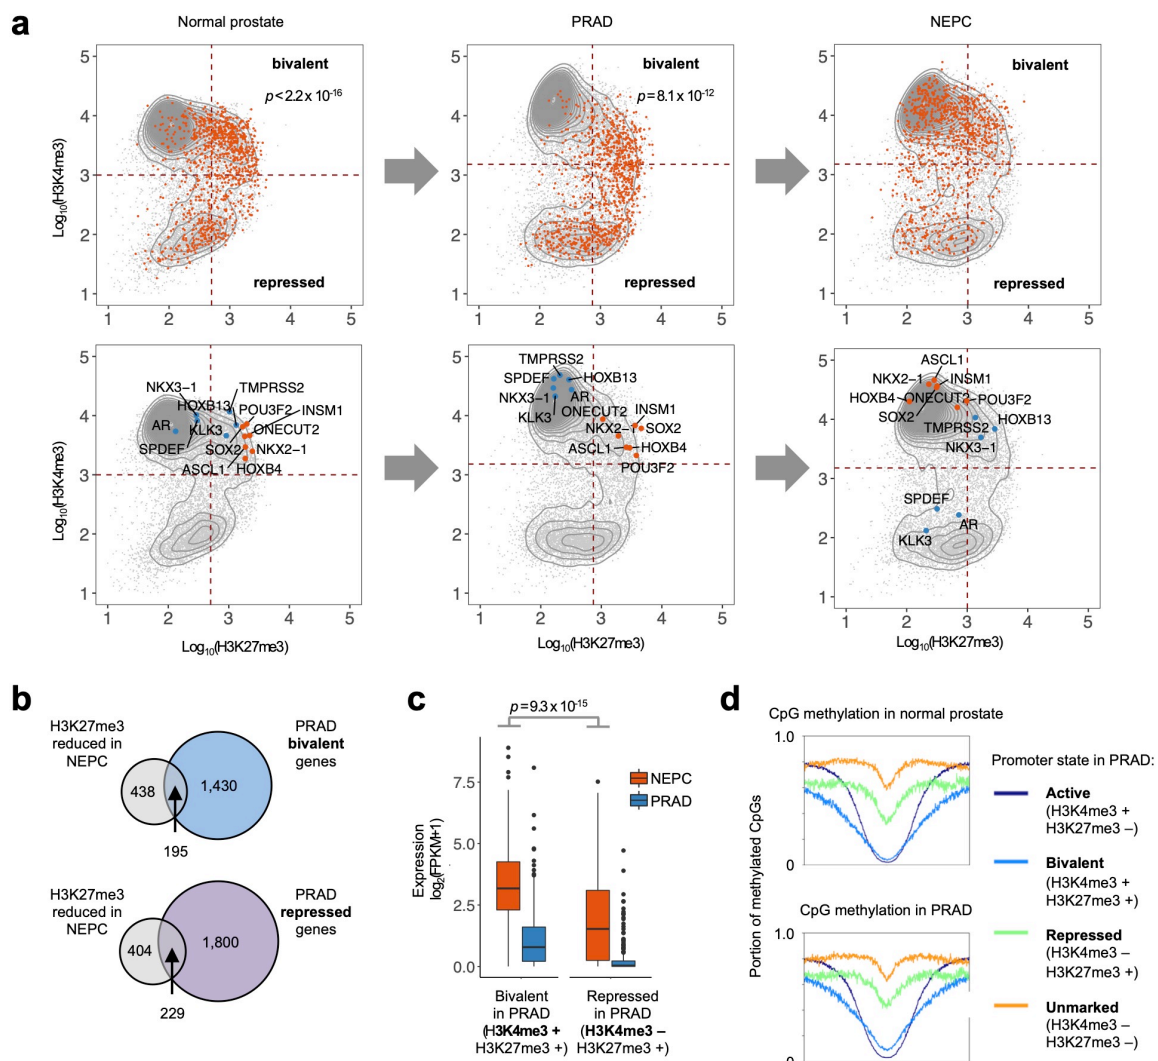

**Figure 6. Encoding of neuroendocrine regulatory programs in the developmental history of prostate cancer.** **a**, Average ChIP-seq tag density in normal prostate ( $n=3$ ), PRAD ( $n=5$ ) and NEPC ( $n=5$ ) for H3K4me3 and H3K27me3 within 2kb of a gene transcriptional start site (TSS). Each dot represents a unique gene TSS. The top row highlights genes with upregulated expression in NEPC compared to PRAD (orange).  $p$ -values indicate Pearson's Chi-squared test comparing enrichment of upregulated genes within the "bivalent" quadrant compared to the bottom two quadrants. Selected genes are highlighted in the bottom row. **b**, Intersection of genes with bivalent ( $\text{H3K27me3}^+/\text{H3K4me3}^+$ ) or repressed ( $\text{H3K27me3}^+/\text{H3K4me3}^-$ ) promoter annotations in PRAD and genes with reduced promoter H3K27me3 in NEPC vs. PRAD ( $\log_2$  fold-change  $< -1$ , FDR-adjusted  $p$ -value = 0.01). **c**, Transcript expression levels in NEPC of genes whose promoters lose H3K27me3 in NEPC compared to PRAD. Genes are grouped by bivalent or repressed promoter annotations in PRAD.  $p$ -value corresponds to Wilcoxon rank-sum test. **d**, Fraction of CpG methylation in normal prostate tissue and PRAD at TSS  $\pm$  3kb for genes in each indicated category.

## Supplementary Figures:

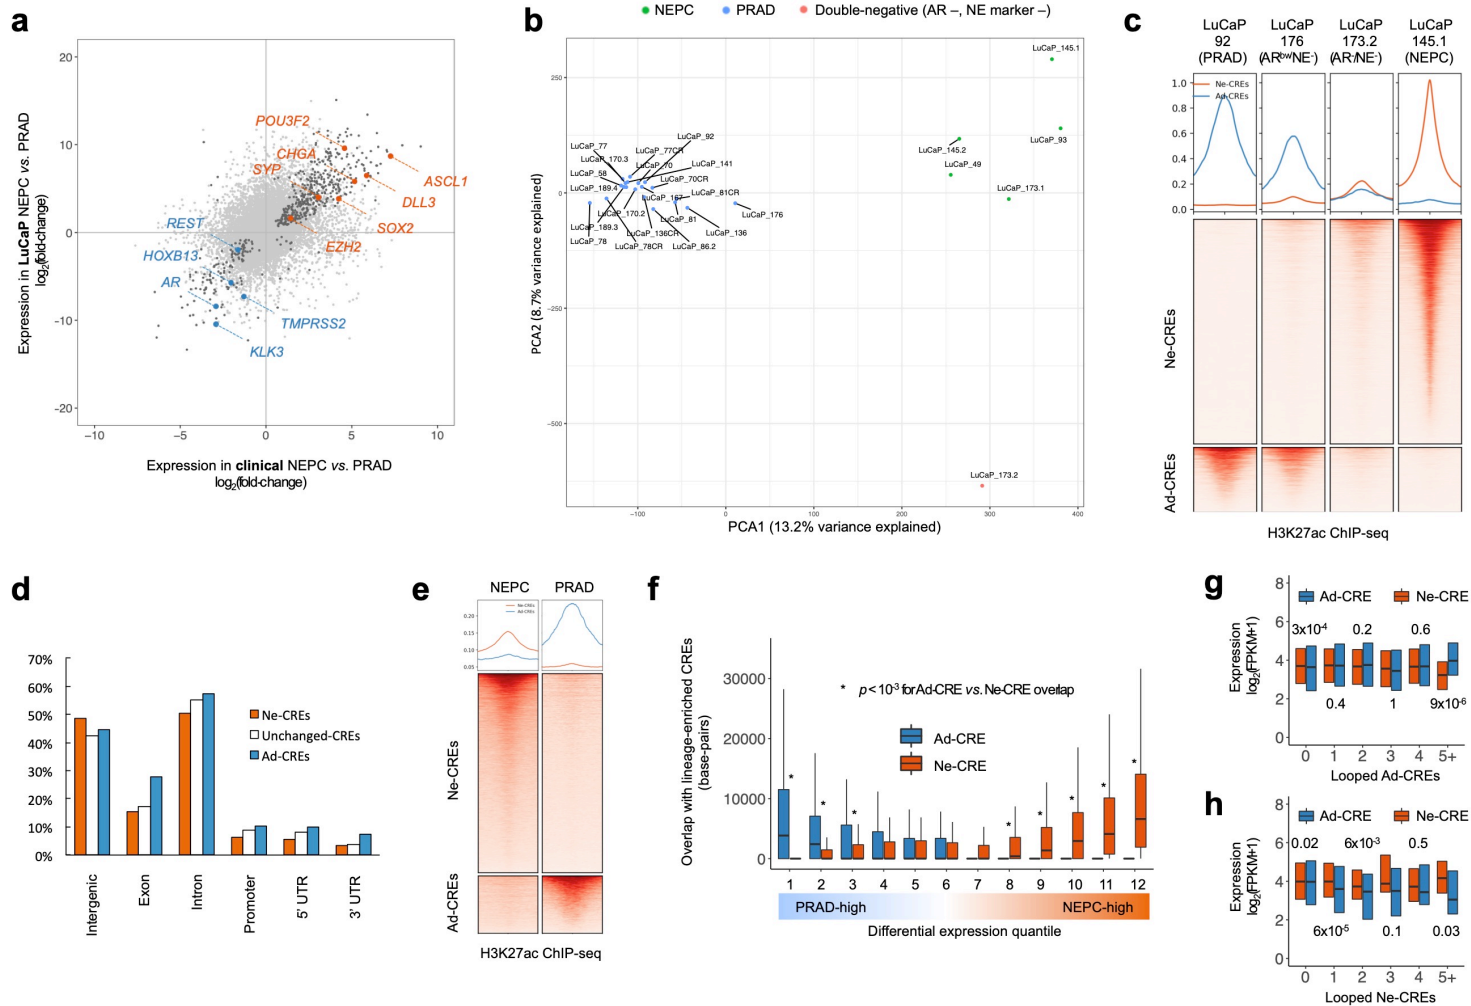

**Supplementary Figure 1. Epigenomic divergence of NEPC and PRAD.** **a**, Comparison of differential gene expression between PRAD and NEPC in LuCaP PDXs (5 of each lineage, with two replicates for each sample) and clinical prostate tumors<sup>8</sup>. Dark gray signifies genes with significant differential expression ( $p < 10^{-4}$ ) in both PDXs and clinical tumors. **b**, Principal component analysis of PRAD and NEPC PDXs based on H3K27ac profiles. “DN” indicates a “double-negative” PDX lacking AR or NE marker expression. **c**, Normalized H3K27ac tag density for AR/NE<sup>-</sup> and AR<sup>low</sup>/NE<sup>-</sup> PDX at Ne-CREs and Ad-CREs, compared to representative PRAD and NEPC PDXs. Profile plots (top) indicate the average tag density at Ne-CREs (orange) and Ad-CREs (blue). **d**, Genomic annotations for lineage-specific and shared H3K27ac peaks. **e**, Normalized H3K27ac tag density at Ne-CREs and Ad-CREs in a clinical NEPC liver metastasis and a PRAD liver metastasis. Profile plots (top) indicate the average tag density at Ne-CREs (orange) and Ad-CREs (blue). **f**, Overlap of Ne-CREs and Ad-CREs with a 200kb window centered around the transcriptional start sites of differentially expressed genes. **g-h**, expression of genes with the indicated number of distinct looped Ad-CREs (g) or Ne-CREs (h) detected by H3K27ac HiChIP in LuCaP 173.1 (NEPC). All  $p$ -values were derived from Wilcoxon paired samples tests.

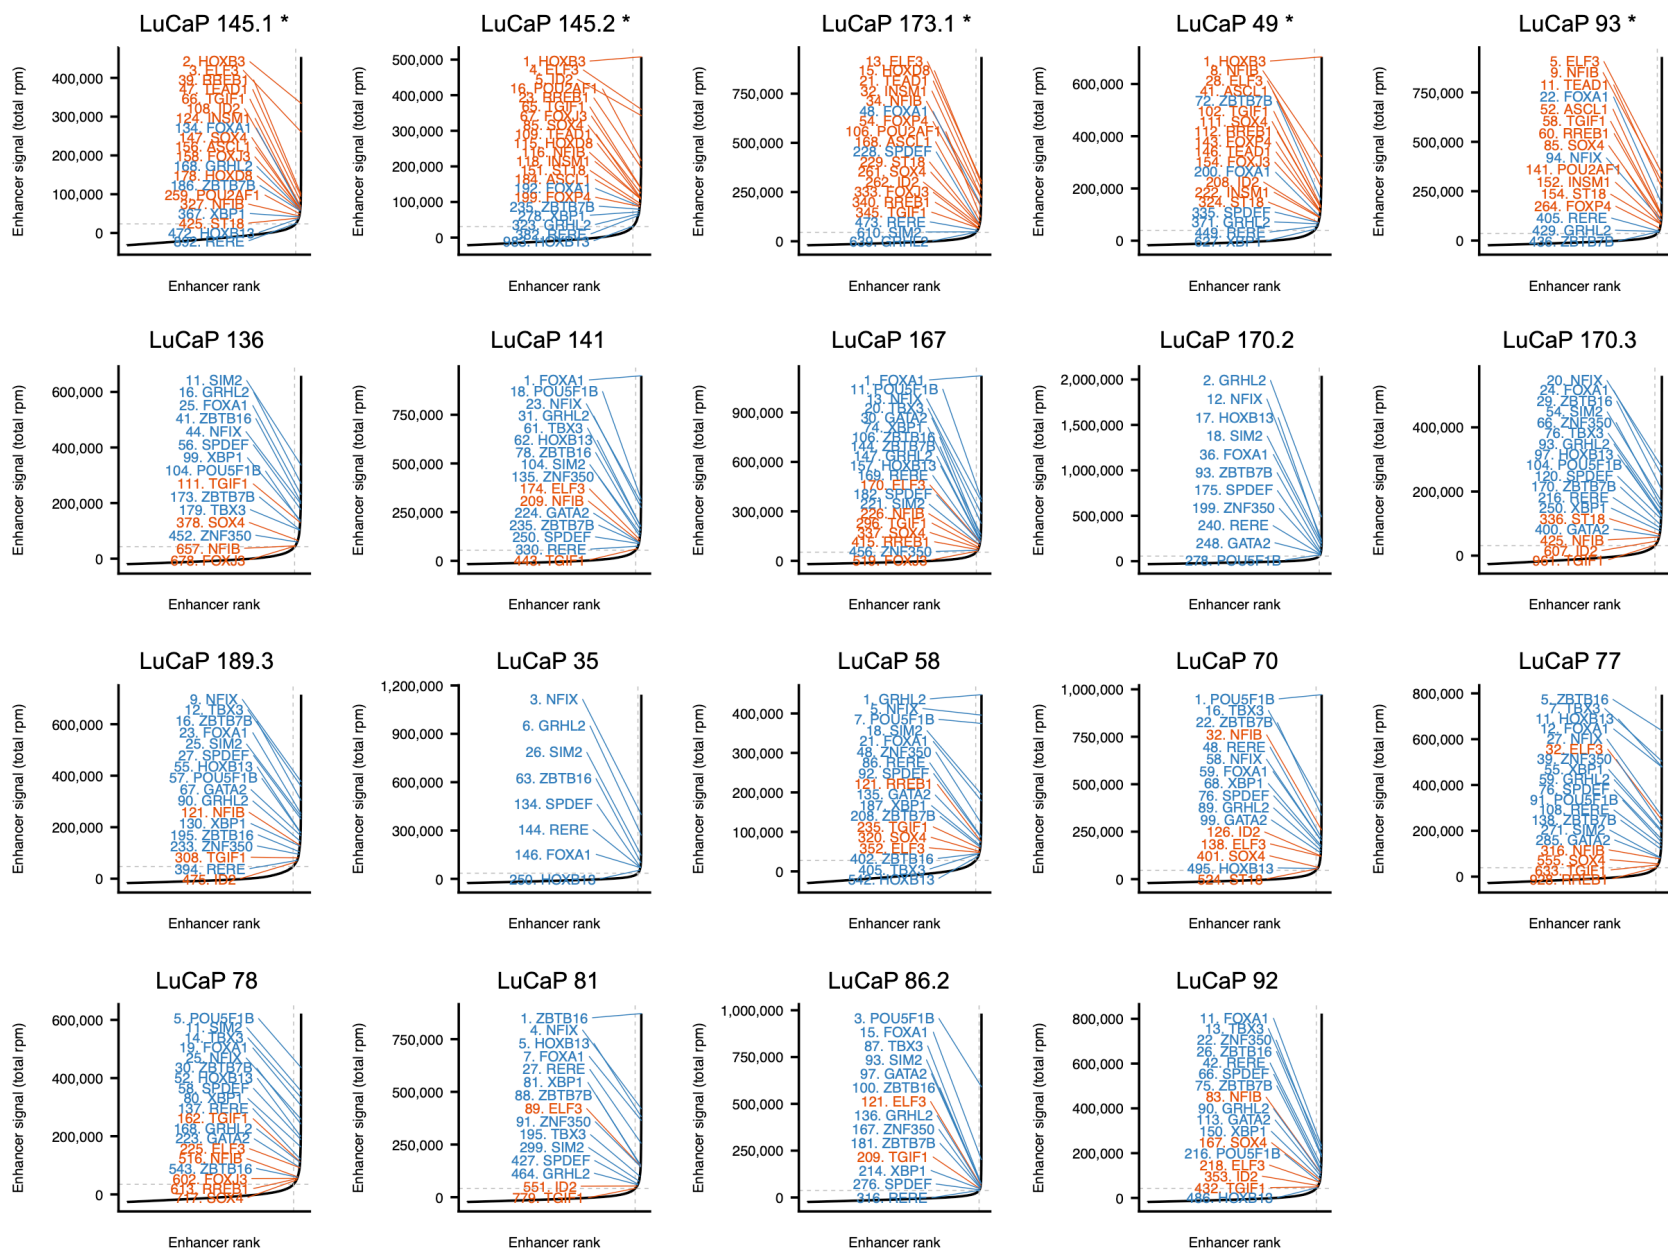

**Supplementary Figure 2. Super-enhancers (SEs) encompassing transcription factor genes that are differentially H3K27 acetylated in NEPC vs. PRAD.** SEs are ranked by H3K27ac signal. NEPC-enriched SEs are shown in orange; PRAD-enriched SEs are shown in blue (methods). Asterisk (\*) indicates NEPC LuCaP PDXs.

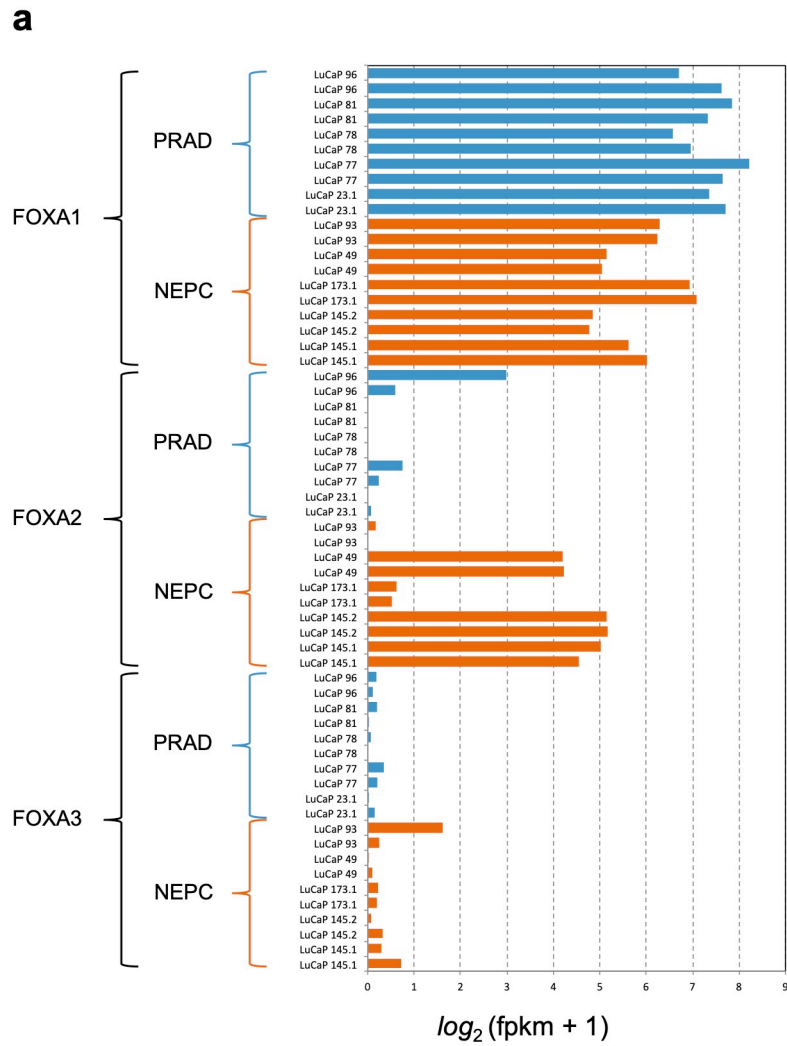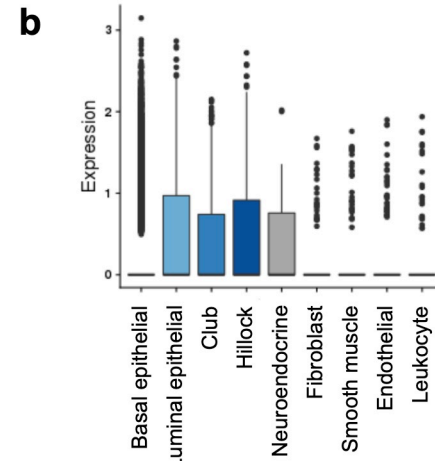

**Supplementary Figure 3. Expression of FOXA1 in PRAD, NEPC, and benign prostatic tissue.** **a**, Transcript expression of FOXA family members in 5 NEPC and 5 PRAD LuCaP PDXs (two replicates each) by RNA-seq. **b**, FOXA1 expression across benign prostate cell types in a published single-cell transcriptome sequencing dataset<sup>70</sup>. Boxes represent the interquartile range.



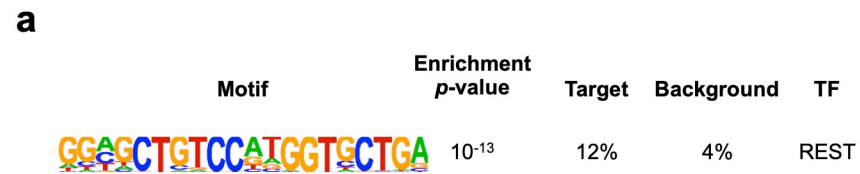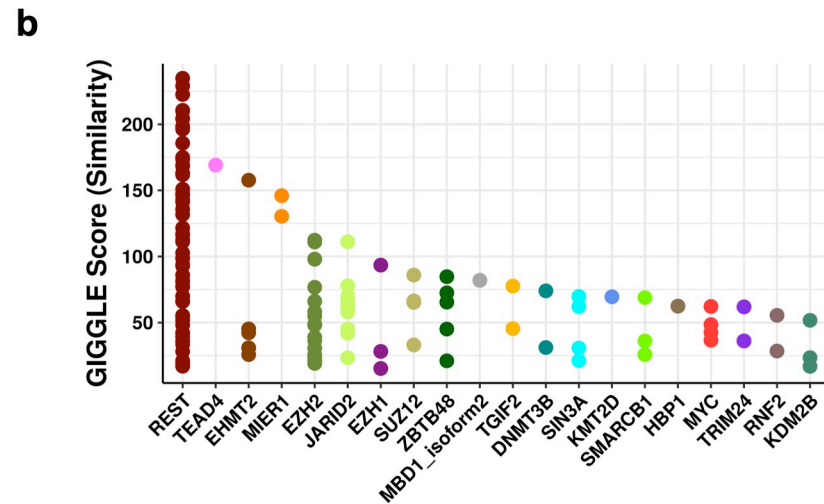

**Supplementary Figure 4. Motif enrichment and TF binding of differentially H3K27 trimethylated promoters.** **a**, Motif enrichment of promoters with diminished H3K27me3 in NEPC compared to PRAD. Only the indicated motif was significantly enriched. **b**, Cistromedb toolkit analysis of published ChIP-seq datasets (dbtoolkit.cistrome.org), ranked by their degree of overlap with the differentially H3K27 trimethylated promoters analyzed in **a**.

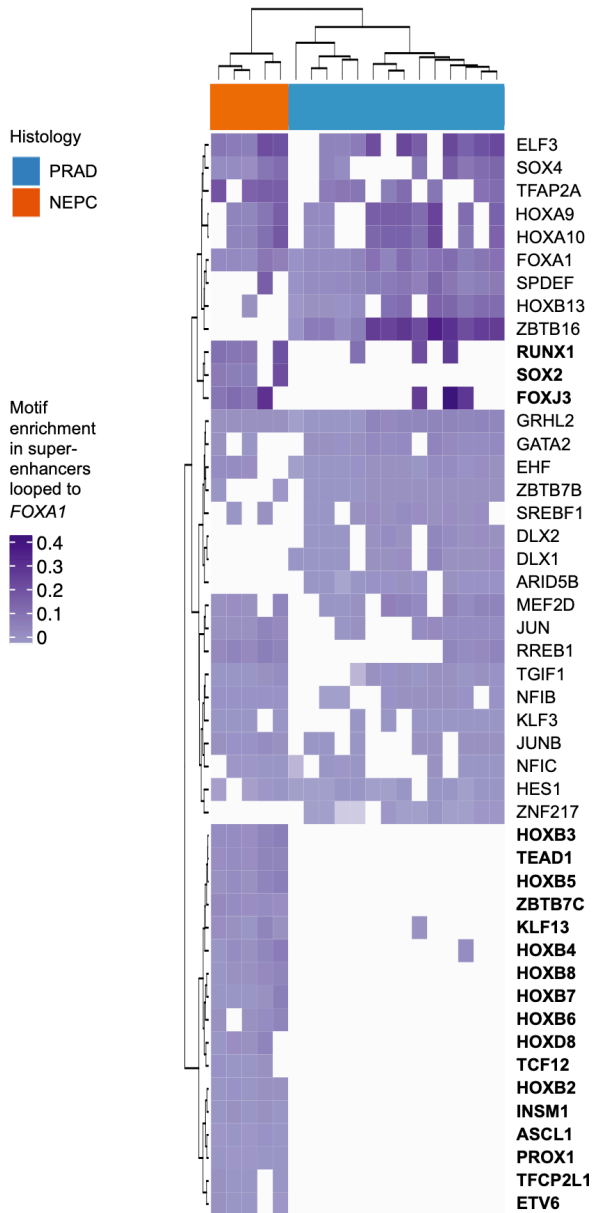

**Supplementary Figure 5.** Candidate TFs involved in regulation of the *FOXA1* locus. Normalized abundance of TF binding motifs at superenhancers looped to the *FOXA1* locus, as assessed by H3K27ac Hi-ChIP in NEPC (LuCaP 173.1) and PRAD (LNCaP). TFs with motif enrichment primarily in NEPC are shown in bold.

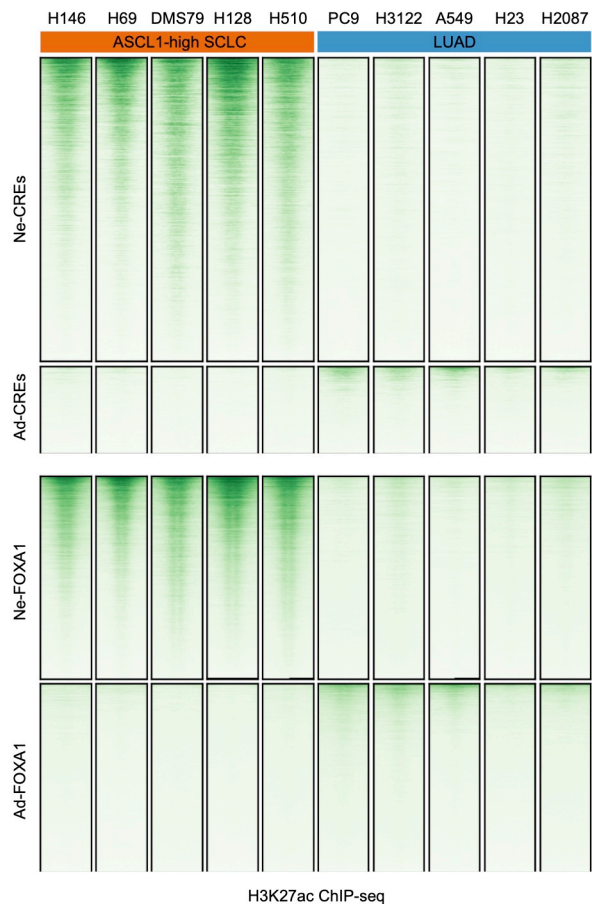

**Supplementary Figure 6. Activation of neuroendocrine candidate regulatory elements in small cell lung cancer.** H3K27ac ChIP-seq profiles of ASCL1-high small cell lung cancer (SCLC) cell lines<sup>51</sup> at Ne-CREs and Ad-CREs (top) and at NEPC-enriched and PRAD-enriched FOXA1 binding sites (bottom). Five lung adenocarcinoma (LUAD) cell lines are shown for comparison.
